# Supplementary material for: Aerosol and splatter generation with rotary handpieces used in restorative and orthodontic dentistry: a systematic review
Source: Springer Nature journal article supplement (doi:10.1038/s41405-022-00118-4), 2022-09-06
Supplement: MOESM1 [file 41405_2022_118_MOESM1_ESM.pdf]

## Extracted data

| Unique Study ID | Study author and reference | If the duration of the procedure was stated, please enter it here                             | If applicable, what was the main equipment used in performing the procedure? (e.g. rotary handpiece, ultrasonic scaler) | If stated and considered relevant, what was the working mechanism and/or the rotation/vibration speed of the main equipment used | Is the equipment used in performing the dental procedure relevant to today's practice (Please choose from the dropdown list Yes, No, N/A) | Was any additional equipments used as a standard measure e.g. rubber dam, suction) (Please choose from the dropdown list Yes, No, N/A) | If yes, Please specify in here                                                                           | Person e.g. dental operator, dental nurse/assistant, patient (choose from dropdown list; Yes, No, N/A) | If Yes please specify who and which parts of body                                                                                                                                                                 |
|-----------------|----------------------------|-----------------------------------------------------------------------------------------------|-------------------------------------------------------------------------------------------------------------------------|----------------------------------------------------------------------------------------------------------------------------------|-------------------------------------------------------------------------------------------------------------------------------------------|----------------------------------------------------------------------------------------------------------------------------------------|----------------------------------------------------------------------------------------------------------|--------------------------------------------------------------------------------------------------------|-------------------------------------------------------------------------------------------------------------------------------------------------------------------------------------------------------------------|
| 99              | Ahmed 2021                 | 3 minutes                                                                                     | Two-hole AA87handpiece (PANA MAX, NSK, Tochigi, Japan)<br>- four-hole handpiece (KAVO, Biberach, Germany).              | high-speed handpiece                                                                                                             | Yes                                                                                                                                       | Yes                                                                                                                                    | High volume suction (DSEplus Type 5193, KAVO, Warthausen, Germany)                                       | Yes                                                                                                    | operator chest, head, forearms, upper leg, and inside facemask.<br>assistant: chest, head, forearms, upper leg, and inside facemask.                                                                              |
| 100             | Allison 2021(a)            | High Speed Air Turbine = 10mins<br>3-in-1 Spray = 30 seconds (replicate washing acid etchant) | Air turbine - Synea TA-98, W&H (UK) LTD and 3-in-1 Spray = Model not stated                                             | high- speed handpiece.<br>3-in1 = air and water<br>140.6mL / min                                                                 | yes                                                                                                                                       | Yes                                                                                                                                    | Suction for 3-in-1 measure at 6.3L of water per minute. Measured with and without suction for high speed | Yes - simulated body of Mannequin and Operator and Assistant                                           | Above mannequin mouth. 4 papers on body of mannequin x2 40cm from hub and x2 80cm.<br><br><b>Assistant and Operator</b> -upper mid forearm, upper chest, upper mid-thigh, Full-face visor and vertex of the head. |

|     |                 |            |                                                                     |                                                                                                                                                                                                 |      |     |                                                                                                                 |                                                              |                                                                                                                                                                                                                                                                                                                                                   |
|-----|-----------------|------------|---------------------------------------------------------------------|-------------------------------------------------------------------------------------------------------------------------------------------------------------------------------------------------|------|-----|-----------------------------------------------------------------------------------------------------------------|--------------------------------------------------------------|---------------------------------------------------------------------------------------------------------------------------------------------------------------------------------------------------------------------------------------------------------------------------------------------------------------------------------------------------|
|     |                 |            |                                                                     |                                                                                                                                                                                                 |      |     |                                                                                                                 |                                                              | Additionally for anterior crown prep with suction plus assistant, 3 filter papers were placed on the mask (beneath a full-face visor).                                                                                                                                                                                                            |
| 120 | Allison 2021(b) | 10 minutes | A speed-increasing handpiece (no water)<br>High-speed               | Highspeed: Approx:<br>400.000rpm<br><br>Micromotor: 60.000rpm;<br>120.000rpm;<br>200.000rpm                                                                                                     | yes  | yes | suction (flow rate 105l/min)                                                                                    | Yes - simulated body of Mannequin and Operator and Assistant | Above mannequin mouth. 4 papers on body of mannequin x2 40cm from hub and x2 80cm. Assistant and Operator -upper mid forearm, upper chest, upper mid-thigh, Full-face visor and vertex of the head.<br><br>Additionally for anterior crown prep with suction plus assistant, 3 filter papers were placed on the mask (beneath a full-face visor). |
| 127 | Allison 2021(c) | 10 minutes | High-speed air-turbine (Synea TA-98, W&H (UK) Ltd.; St Albans, UK). | no                                                                                                                                                                                              | yes  | yes | medium volume suction (dental suction with an 8.3 mm internal diameter suction tip at a flow rate of 133 L/min) | Yes                                                          | Active air sampling:<br>Operator: the left chest pocket                                                                                                                                                                                                                                                                                           |
| 93  | Belting 1964    | 1 minute   | Air rotor                                                           | The dental air rotor (Borden Airotor, Ritter Co., Inc., Rochester, N. Y.) with no. 171 bur attached operating at an air flow pressure of 30 psi using 30 drops of oil and 18ml water per minute | YES? | Yes | air rotor was used with and without water                                                                       | No                                                           | N/A                                                                                                                                                                                                                                                                                                                                               |

|     |                     |                                                                                                                                                 |                                                                                                                                |                         |     |      |                                                                                                                                                                                                                                       |     |                                                                                                        |
|-----|---------------------|-------------------------------------------------------------------------------------------------------------------------------------------------|--------------------------------------------------------------------------------------------------------------------------------|-------------------------|-----|------|---------------------------------------------------------------------------------------------------------------------------------------------------------------------------------------------------------------------------------------|-----|--------------------------------------------------------------------------------------------------------|
| 8   | Bentley 1994        | Experiment 1) 2 minutes (spatter)<br>Experiment 2a) 30 minutes (aerosol with high speed)<br>Experiment 2b))30 minutes (aerosol with ultrasonic) | 1) high speed handpiece<br>2 high speed handpiece                                                                              | Not stated              | Yes | Yes  | 1) High volume aspirator with high speed handpiece tooth preparation<br>2a) high volume aspirator with high speed handpiece<br>2b) saliva ejector with ultrasonic scaler                                                              | Yes | Operator: headcaps, masks and gowns.<br>Dental Assistant: headcaps, masks and gowns.<br>Patient: chest |
| 29  | Grenier 1995        | High-speed drilling= 8 minutes                                                                                                                  | High speed handpiece                                                                                                           | not stated              | Yes | Yes  | rubber dam                                                                                                                                                                                                                            | No  | N/A                                                                                                    |
| 122 | Grzech-Lesniak 2021 | NA                                                                                                                                              | highspeed handpiece W&H Synea TA-98LC (W&H, Bürmoos, Austria)<br>low-speed handpiece W&H Synea TA-98LC (W&H, Bürmoos, Austria) | 200,000rpm<br>15,000rpm | Yes | Yes  | 1) saliva ejector (SE) EM15 (Monoart® Euronda, Vicenza, Italy) and (2) high-volume evacuator (HVE) EM19 EVO (Monoart® Euronda, Vicenza, Italy).<br>Evacuators were placed at the level of the tooth around 2 cm from its buccal side. | Yes | Operatore mouth: 2 cm away<br>Assistant: Mouth : 2cm away<br>Patient (simulated): mputh                |
| 107 | Han 2021            | Low speed: 5 min<br>Highspeed: 5s<br>triple syringe: 15s                                                                                        | Air turbine handpiece ((TiMax, NSK, Kanuma, Japan)<br>low-speed air turbine handpiece (W&H implantMED™, Bürmoos, Austria)      | 300,000 rpm<br>1200 rpm | Yes | None | N/A                                                                                                                                                                                                                                   | Yes | Operator: 20cm representing dentist position<br>Assisstant: 29 cm representing the Assistant position  |

|     |               |            |                                                                                                                                                                                                                                                                                                      |                            |     |                                                                                                                       |                                                                                   |     |                                                                                    |
|-----|---------------|------------|------------------------------------------------------------------------------------------------------------------------------------------------------------------------------------------------------------------------------------------------------------------------------------------------------|----------------------------|-----|-----------------------------------------------------------------------------------------------------------------------|-----------------------------------------------------------------------------------|-----|------------------------------------------------------------------------------------|
|     |               |            | Triple syringe                                                                                                                                                                                                                                                                                       |                            |     |                                                                                                                       |                                                                                   |     |                                                                                    |
| 36  | Hausler 1966  | not clear  | high speed handpiece and air turbine                                                                                                                                                                                                                                                                 | 2.000 rpm                  | No  | No                                                                                                                    | This is an old study, here is relevance bt the handpieces etc may not be the same | No  | NA                                                                                 |
| 108 | Holliday 2021 | 10 minutes | Highspeed Hand piece.                                                                                                                                                                                                                                                                                | not stated                 | Yes | Dental suction at two flow rates:<br>low volume suction, 40 L/min of air;<br>medium volume suction, 159 L/min of air. |                                                                                   | No  | na                                                                                 |
| 109 | Ionescu 2020  | 4 minutes  | * Highspeed: Air turbine handpiece (Bora Led, Bien-Air Dental) equipped with a cylindrical diamond bur (835KR.314.016, Komet Italia Srl).<br><br>**Slow-speed: contra-angle handpiece (CA 1:1, Bien-Air) with a round tungsten carbide bur (H1SM.204.020, Komet) inside the already prepared cavity. | 320,000 rpm.<br>50.000 rpm | Yes | N/A                                                                                                                   | N/A                                                                               | Yes | Patient: 14 sites on the dental chair<br><b>Assisstant:</b> 1 on the assistant pad |

|     |                       |             |                                                                                                                                                                           |                                                                                                                                                                           |      |     |                           |     |                                                                                                                                                                     |
|-----|-----------------------|-------------|---------------------------------------------------------------------------------------------------------------------------------------------------------------------------|---------------------------------------------------------------------------------------------------------------------------------------------------------------------------|------|-----|---------------------------|-----|---------------------------------------------------------------------------------------------------------------------------------------------------------------------|
| 91  | Llarato 1966          | 1.5-5 mins. | air turbine drill                                                                                                                                                         | N/A                                                                                                                                                                       | YES? | Yes | Unit aspirating system    | N/A | N/A                                                                                                                                                                 |
| 113 | Llandro 2021          | 10 minutes  | * speed-increasing dental handpiece driven by a dental air motor at full speed (with no water coolant)                                                                    |                                                                                                                                                                           | Yes  | yes | Large bore dental suction | Yes | Operator: forearms, chest, upper leg and head, their masks and full-face visor.<br>assistant: forearms, chest, upper leg and head, their masks and full-face visor. |
| 50  | Manarte-Monteiro 2013 | 1-4 hours   | Manual (endodontic) + high-speed handpieces (turbine) (for endodontic & restorative)                                                                                      | rotary action, with water-cooling;                                                                                                                                        | Yes  | Yes | Rubber dam                | NA  | NA                                                                                                                                                                  |
| 90  | Miller 1971           | 20 seconds  | Air turbine Handspeed+ 557 bur (multiple procedures). Rubber cup and pumice (periodontics).                                                                               | N/A                                                                                                                                                                       | YES? | Yes | High velocity suction     | No  | N/A                                                                                                                                                                 |
| 115 | Nulty 2020            | 1 Minutes   | Electric Micromotor: "Micromotor high-speed handpiece with water"<br>Mircomotor<br>Air turbine: HIGH SPEED WITH WATER<br>Low speed with water<br>Three-in-one             |                                                                                                                                                                           | Yes  | yes | saliva ejector            | no  | N/A                                                                                                                                                                 |
| 60  | Purohit 2009          | N/A         | Prophylaxis was carried out with a Magnetostrictive scaler working at a speed of 30 kHz, with a water pressure of 0.3 MPa during each treatment. A high speed air turbine | Prophylaxis was carried out with a Magnetostrictive scaler working at a speed of 30 kHz, with a water pressure of 0.3 MPa during each treatment. A high speed air turbine | Yes  | No  | N/A                       | Yes | Operator: chest<br>Patient: chest                                                                                                                                   |

|     |                   |              |                                                                                                                                                 |                                                                                                                                           |     |            |                                                          |     |                                           |
|-----|-------------------|--------------|-------------------------------------------------------------------------------------------------------------------------------------------------|-------------------------------------------------------------------------------------------------------------------------------------------|-----|------------|----------------------------------------------------------|-----|-------------------------------------------|
|     |                   |              | handpiece, working at a speed of 400,000 rpm and with an air drive pressure of 0.25 MPa was used for preparing cavities on carious teeth.       | handpiece, working at a speed of 400,000 rpm and with an air drive pressure of 0.25 MPa was used for preparing cavities on carious teeth. |     |            |                                                          |     |                                           |
| 63  | Rautemaa 2006     | 40 minutes   | High speed rotating instrument (for the restorative treatment). No equipment details were provided regarding (endodontic/periodontic) treatment | Not stated                                                                                                                                | N/A | No         | N/A                                                      | Yes | Operator: mask<br>Dental Assisstant: mask |
| 88  | Samaranayake 1989 | 5-15 mins.   | Not stated                                                                                                                                      | Not stated                                                                                                                                | Yes | Not stated | Not stated                                               | No  | N/A                                       |
| 128 | Shahdad 2021      | 20 minutes   | air turbine (W&H Synea Turbine TA-98LED, Bürmoos, Austria)                                                                                      | 360.000rpm                                                                                                                                | Yes | Yes        | high-volume suction (HVS) and a saliva ejector (SE).     | No  | NA                                        |
| 94  | Tag El-Din 1997   | 5-15 minutes | air-turbine-driven handpiece                                                                                                                    | Air driven                                                                                                                                | Yes | Yes        | with and without rubber dam                              | Yes | Patient: chest                            |
| 87  | Yamada 2011       | Not stated   | High speed rotating instrument and ultrasonic scaler                                                                                            | Not stated                                                                                                                                | Yes | Yes        | High volume evacuator systems (2 at different locations) | No  | N/A                                       |

| Uniqu<br>e<br>Study<br>ID | Study<br>author<br>and<br>referenc<br>e | If the durati<br>on of the<br>proce<br>dure was<br>state | If applicable,<br>what was the<br>main<br>equipment<br>used in<br>performing<br>the<br>procedure? | If stated<br>and<br>consider<br>ed<br>relevant<br>, what<br>was the<br>working | Is the equipm<br>ent<br>used in<br>perform<br>ing the<br>dental<br>procedu | Was<br>any<br>additi<br>onal<br>equip<br>ments<br>used<br>as a | If yes,<br>Please<br>specify in<br>here | Person<br>e.g.<br>dental<br>operat<br>or,<br>dental<br>nurse/<br>assista | If Yes please specify who<br>and which parts of body | Environmen<br>t area<br>measured<br>within<br>surgery or<br>laboratory<br>was it air, ?<br>(choose | If Yes, please specify<br>which areas of the<br>environment | Was the measur<br>e<br>microbi<br>ological<br>?<br>(Please<br>choose | Please<br>state<br>the<br>microbi<br>ological<br>type<br>(bacteri<br>a, | If<br>the<br>orga<br>nis<br>m<br>measur<br>ed |
|---------------------------|-----------------------------------------|----------------------------------------------------------|---------------------------------------------------------------------------------------------------|--------------------------------------------------------------------------------|----------------------------------------------------------------------------|----------------------------------------------------------------|-----------------------------------------|--------------------------------------------------------------------------|------------------------------------------------------|----------------------------------------------------------------------------------------------------|-------------------------------------------------------------|----------------------------------------------------------------------|-------------------------------------------------------------------------|-----------------------------------------------|
|---------------------------|-----------------------------------------|----------------------------------------------------------|---------------------------------------------------------------------------------------------------|--------------------------------------------------------------------------------|----------------------------------------------------------------------------|----------------------------------------------------------------|-----------------------------------------|--------------------------------------------------------------------------|------------------------------------------------------|----------------------------------------------------------------------------------------------------|-------------------------------------------------------------|----------------------------------------------------------------------|-------------------------------------------------------------------------|-----------------------------------------------|

|    |            | d, please enter it here | (e.g.rotary handpiece, ultrasonic scaler)                                                               | mechanism and/or the rotation/vibration speed of the main equipment used | re relevant to today's practice (Please choose from the dropdown list Yes, No, N/A) | standard measure e.g. rubber dam, suction) (Please choose from the dropdown list Yes, No, N/A) |                                                                    | nt, patient (choose from dropdown list; Yes, No, N/A) |                                                                                                                                   | from dropdown list; Yes, No, N/A) |                                                                                                                                                                                                                                              | from the dropdown list Yes/other) | viruses, fungi, prions) | was stated specifically, please state here (e.g. aerobic bacteria, respiratory viruses, Hep B, HIV, aspergilla etc) |
|----|------------|-------------------------|---------------------------------------------------------------------------------------------------------|--------------------------------------------------------------------------|-------------------------------------------------------------------------------------|------------------------------------------------------------------------------------------------|--------------------------------------------------------------------|-------------------------------------------------------|-----------------------------------------------------------------------------------------------------------------------------------|-----------------------------------|----------------------------------------------------------------------------------------------------------------------------------------------------------------------------------------------------------------------------------------------|-----------------------------------|-------------------------|---------------------------------------------------------------------------------------------------------------------|
| 99 | Ahmed 2021 | 3 minutes               | Two-hole AA87handpiece (PANA MAX, NSK, Tochigi, Japan) - four-hole handpiece (KAVO, Biberach, Germany). | high-speed handpiece                                                     | Yes                                                                                 | Yes                                                                                            | High volume suction (DSEplus Type 5193, KAVO,Wart hausen, Germany) | Yes                                                   | operator chest, head, forearms, upper leg, and inside facemask. assistant: chest, head, forearms, upper leg, and inside facemask. | Yes                               | Multiple qualitative cotton cellulose filter paper (Whatman; Maidstone, England) was placed at a distance of 12-inches from each other up to 60-inches away from the dental manikin and at six different directions ( at 2, 4, 6, 8, 10, and | Other                             | N/A                     | N/A                                                                                                                 |

|     |                 |                                                                                               |                                                                             |                                                                                    |     |     |                                                                                                          |                                                              |                                                                                                                                                                                                                                                                                                                                                           |                                |                                                                                                                                                                                                                                                                                                                                                           |       |     |     |
|-----|-----------------|-----------------------------------------------------------------------------------------------|-----------------------------------------------------------------------------|------------------------------------------------------------------------------------|-----|-----|----------------------------------------------------------------------------------------------------------|--------------------------------------------------------------|-----------------------------------------------------------------------------------------------------------------------------------------------------------------------------------------------------------------------------------------------------------------------------------------------------------------------------------------------------------|--------------------------------|-----------------------------------------------------------------------------------------------------------------------------------------------------------------------------------------------------------------------------------------------------------------------------------------------------------------------------------------------------------|-------|-----|-----|
|     |                 |                                                                                               |                                                                             |                                                                                    |     |     |                                                                                                          |                                                              |                                                                                                                                                                                                                                                                                                                                                           |                                | 12 o'clock positions ) around the manikin head .                                                                                                                                                                                                                                                                                                          |       |     |     |
| 100 | Allison 2021(a) | High Speed<br>Air Turbine = 10mins 3-in-1 Spray = 30 seconds (replicate washing acid etchant) | Air turbine - Synea TA-98, W&H (UK) LTD and 3-in-1 Spray = Model not stated | high-speed handpiece. 3-in-1 = air and water 140.6mL / min                         | yes | Yes | Suction for 3-in-1 measure at 6.3L of water per minute. Measured with and without suction for high speed | Yes - simulated body of Mannequin and Operator and Assistant | Above mannequin mouth. 4 papers on body of mannequin x2 40cm from hub and x2 80cm.<br><br><b>Assistant</b> and Operator - upper mid forearm, upper chest, upper mid-thigh, Full-face visor and vertex of the head. Additionally for anterior crown prep with suction plus assistant, 3 filter papers were placed on the mask (beneath a full-face visor). | Yes                            | Platform spaced at 0.5, intervals along eight, 4m, rigid rods, laid out at 45 degree intervals and supported by a central hub, thus creating a 8m diameter circle around the mannequin. The centre of the circle was placed 25cm superior to the mouth. Aerosol & splatter measured by contaminated surface area distance from centre 0, 0.5, 1, 1.5, 2m) | Other | N/A | N/A |
| 120 | Allison 2021(b) | 10 minutes                                                                                    | A speed-increasing handpiece (no water) High-speed                          | Highspeed: Approx: 400.000rpm<br><br>Micromotor: 60.000rpm; 120.000rpm; 200.000rpm | yes | yes | suction (flow rate 105l/min)                                                                             | Yes - simulated body of Mannequin and Operator and Assistant | Above mannequin mouth. 4 papers on body of mannequin x2 40cm from hub and x2 80cm.<br><br>Assistant and Operator - upper mid forearm, upper chest, upper mid-thigh, Full-face visor and vertex of the head. Additionally for anterior crown prep with suction plus assistant, 3 filter papers were placed on the mask (beneath a full-face visor).        | only measured settle on papers | Platform spaced at 0.5, intervals along eight, 4m, rigid rods, laid out at 45 degree intervals and supported by a central hub, thus creating a 8m diameter circle around the mannequin. The centre of the circle was placed 25cm superior to the mouth. Aerosol & splatter measured by                                                                    | Other | N/A | N/A |

|     |                 |            |                                                                     |    |     |     |                                                                                                                 |     |                                                             |                                       |                                                                                                                                                                                                                                                                                                                                                                                                                                                                                                                                                                                                                 |    |     |     |
|-----|-----------------|------------|---------------------------------------------------------------------|----|-----|-----|-----------------------------------------------------------------------------------------------------------------|-----|-------------------------------------------------------------|---------------------------------------|-----------------------------------------------------------------------------------------------------------------------------------------------------------------------------------------------------------------------------------------------------------------------------------------------------------------------------------------------------------------------------------------------------------------------------------------------------------------------------------------------------------------------------------------------------------------------------------------------------------------|----|-----|-----|
|     |                 |            |                                                                     |    |     |     |                                                                                                                 |     |                                                             |                                       | contaminated surface area distance from centre 0, 0.5, 1. 1.5, 2m)                                                                                                                                                                                                                                                                                                                                                                                                                                                                                                                                              |    |     |     |
| 127 | Allison 2021(c) | 10 minutes | High-speed air-turbine (Synea TA-98, W&H (UK) Ltd.; St Albans, UK). | no | yes | yes | medium volume suction (dental suction with an 8.3 mm internal diameter suction tip at a flow rate of 133 L/min) | Yes | Active air sampling: <b>Operator:</b> the left chest pocket | Air sampling and settled filter paper | <p>Air sampling: Particle counting and multiple-chair setting: 0.5 m inferior to the mouth of the mannequin, and to the left of the mannequin at 2m. In single chair setting: 0.5 m to the right of the mannequin and 2m at the foot of the dental chair.</p> <p>Active sampling: Multiple-chair setting: 0.5, 1.0, and 2.0 m to the left of the mannequin. Single surgery setting: at 0.15 m on the mannequin (chest), 0.5 m to the right of the mannequin, 1 m on the dental chair, and 2 m at the end of the dental chair.</p> <p>Passive sampling: filter papers fixed on a platform and spaced at 0.5,</p> | No | N/A | N/A |

|    |              |          |           |                                                                                                                                                                                      |      |     |                                           |    |     |     |                                                                                                                                                                                                                                                                                                                                   |     |          |                            |
|----|--------------|----------|-----------|--------------------------------------------------------------------------------------------------------------------------------------------------------------------------------------|------|-----|-------------------------------------------|----|-----|-----|-----------------------------------------------------------------------------------------------------------------------------------------------------------------------------------------------------------------------------------------------------------------------------------------------------------------------------------|-----|----------|----------------------------|
|    |              |          |           |                                                                                                                                                                                      |      |     |                                           |    |     |     | intervals along eight, 4m, rigid rods, laid out at 45 degree intervals and supported by a central hub, thus creating a 8m diameter circle around the mannequin. The centre of the circle was placed 25cm superior to the mouth. Aerosol & splatter measured by contaminated surface area distance from centre 0, 0.5, 1. 1.5, 2m) |     |          |                            |
| 93 | Belting 1964 | 1 minute | Air rotor | The dental air rotor (Borden Airotor, Ritter Co., Inc., Rochester, N. Y.) with no. 171 bur attached operating at an air flow pressure of 30 psi using 30 drops of oil and 18ml water | YES? | Yes | air rotor was used with and without water | No | N/A | Yes | Petri dishes placed in three positions: (1) In front of the patient mouth at chin level 6 inches away (2) Bracket table in front of the patient, 2 ft. away from patient mouth, (3) On the instrument cabinet to the right front of the patient 4 ft. away from patient mouth.                                                    | Yes | Bacteria | Mycobacterium tuberculosis |

|     |                     |                                                                                                                                           |                                                |                         |     |     |                                                                                                                                                                    |     |                                                                                                        |              |                                                                                                                                                                                                  |       |            |                              |
|-----|---------------------|-------------------------------------------------------------------------------------------------------------------------------------------|------------------------------------------------|-------------------------|-----|-----|--------------------------------------------------------------------------------------------------------------------------------------------------------------------|-----|--------------------------------------------------------------------------------------------------------|--------------|--------------------------------------------------------------------------------------------------------------------------------------------------------------------------------------------------|-------|------------|------------------------------|
|     |                     |                                                                                                                                           |                                                | per minute              |     |     |                                                                                                                                                                    |     |                                                                                                        |              |                                                                                                                                                                                                  |       |            |                              |
| 8   | Bentley 1994        | Experiment 1) 2 minutes (spatter) Experiment 2a) 30 minutes (aerosol with high speed) Experiment 2b))30 minutes (aerosol with ultrasonic) | 1) high speed handpiece 2 high speed handpiece | Not stated              | Yes | Yes | 1) High volume aspirator with high speed handpiece tooth preparation 2a) high volume aspirator with high speed handpiece 2b) saliva ejector with ultrasonic scaler | Yes | Operator: headcaps, masks and gowns.<br>Dental Assistant: headcaps, masks and gowns.<br>Patient: chest | Yes          | 1) Blood agar culture plates were placed along the six spokes of the headrest extension device at 12 and 24 inches from the subject's mouth<br>2) bracket table,<br>3) counter tops,<br>4) light | Both  | Bacteria I | alpha hemolytic streptococci |
| 29  | Grnier 1995         | High-speed drilling = 8 minutes                                                                                                           | High speed handpiece                           | not stated              | Yes | Yes | rubber dam                                                                                                                                                         | No  | N/A                                                                                                    | Air sampling | Air sampler placed 122 cm away from the patient's mouth                                                                                                                                          | Yes   | Bacteria I | anaerobic bacteria           |
| 122 | Grzech-Lesniak 2021 | NA                                                                                                                                        | highspeed handpiece W&H Synea TA-98LC          | 200,000rpm<br>15,000rpm | Yes | Yes | 1) saliva ejector (SE) EM15 (Monoart®                                                                                                                              | Yes | Operatore mouth: 2 cm away<br>Assistant: Mouth : 2cm                                                   | No           | NA                                                                                                                                                                                               | Other | N/A        | N/A                          |

|     |          |                                                            |                                                                                                                                                 |                         |     |      |                                                                                                                                                                                                 |     |                                                                                                      |     |                                                                                                                                                                                                                                                                                                                      |       |    |    |
|-----|----------|------------------------------------------------------------|-------------------------------------------------------------------------------------------------------------------------------------------------|-------------------------|-----|------|-------------------------------------------------------------------------------------------------------------------------------------------------------------------------------------------------|-----|------------------------------------------------------------------------------------------------------|-----|----------------------------------------------------------------------------------------------------------------------------------------------------------------------------------------------------------------------------------------------------------------------------------------------------------------------|-------|----|----|
|     |          |                                                            | (W&H, Bürmoos, Austria)<br>low-speed handpiece<br>W&H Synea TA-98LC<br>(W&H, Bürmoos, Austria)                                                  |                         |     |      | Euronda, Vicenza, Italy) and (2) high-volume evacuator (HVE) EM19 EVO (Monoart® Euronda, Vicenza, Italy).<br>Evacuators were placed at the level of the tooth around 2 cm from its buccal side. |     | away<br>Patient (simulated): mputh                                                                   |     |                                                                                                                                                                                                                                                                                                                      |       |    |    |
| 107 | Han 2021 | Low speed : 5 min<br>High speed: 5s<br>triple syringe: 15s | Air turbine handpiece ((TiMax, NSK, Kanuma, Japan)<br>low-speed air turbine handpiece (W&H implantMED™, Bürmoos, Austria)<br><br>Triple syringe | 300,000 rpm<br>1200 rpm | Yes | None | N/A                                                                                                                                                                                             | Yes | Operator: 20cm representing dentist position<br>Assistant: 29 cm representing the Assistant position | Yes | 3:35cm opposite the dentist<br>4: 29cm away from the left chest<br>5: 30 cm in the middle<br>6: 29cm away from the right chest<br>7: 60 cm in front of the patient mouth (left)<br>8 : 60cm in front of the patient mouth (right)<br>9: 80 cm away from the patient (left)<br>10 120cm away from the patient (right) | Other | NA | NA |

|     |               |            |                                      |            |     |                                                                                                                 |                                                                                   |    |    |                             |                                                                                                                                                                                                                                                                                                                                                                                                                                                                                                                                                                                              |       |            |            |
|-----|---------------|------------|--------------------------------------|------------|-----|-----------------------------------------------------------------------------------------------------------------|-----------------------------------------------------------------------------------|----|----|-----------------------------|----------------------------------------------------------------------------------------------------------------------------------------------------------------------------------------------------------------------------------------------------------------------------------------------------------------------------------------------------------------------------------------------------------------------------------------------------------------------------------------------------------------------------------------------------------------------------------------------|-------|------------|------------|
| 36  | Hausler 1966  | not clear  | high speed handpiece and air turbine | 2.000 rpm  | No  | No                                                                                                              | This is an old study, here is relevance bt the handpieces etc may not be the same | No | NA | Air sampling+ Settle plates | Three air samplers and plates were placed in a straight line at distance of 10, 20, and 30 inches from the tooth.                                                                                                                                                                                                                                                                                                                                                                                                                                                                            | Yes   | Bacteria I | s mar cens |
| 108 | Holliday 2021 | 10 minutes | Highspeed Hand piece.                | not stated | Yes | Dental suction at two flow rates: low volume suction, 40 L/min of air; medium volume suction, 159 L/min of air. |                                                                                   | No | na | Yes                         | <p><b>*Around the mannequin:</b> 1 m diameter rig was constructed with four rods arranged at 90°</p> <p><b>*Further away within the dental setting:</b> A linear 12m rig was constructed in the adjacent walkway which had collection platforms at 0.5 m intervals for the 2 m either side of the centre, and then subsequently at 1 m intervals out to 6 m either side of the centre.</p> <p>*Benchtops (86 cm height);<br/>*bracket table situated directly over the dental chair;<br/>*On top of separating divides to the other half of the clinic where appropriate (123cm height).</p> | Other | NA         | NA         |

|     |                 |                |                                                                                                                                                                                                                                                                                                                                                                                  |                                  |      |     |                              |     |                                                                                                |              |                                                                                                                                                                                                                                                                                                                                                                                   |     |               |                                                        |
|-----|-----------------|----------------|----------------------------------------------------------------------------------------------------------------------------------------------------------------------------------------------------------------------------------------------------------------------------------------------------------------------------------------------------------------------------------|----------------------------------|------|-----|------------------------------|-----|------------------------------------------------------------------------------------------------|--------------|-----------------------------------------------------------------------------------------------------------------------------------------------------------------------------------------------------------------------------------------------------------------------------------------------------------------------------------------------------------------------------------|-----|---------------|--------------------------------------------------------|
| 109 | Ionescu<br>2020 | 4<br>minutes   | * Highspeed:<br>Air turbine<br>handpiece<br>(Bora Led,<br>Bien-Air<br>Dental)<br>equipped with<br>a cylindrical<br>diamond bur<br>(835KR.314.0<br>16, Komet<br>Italia Srl).<br><br>**Slow-<br>speed: contra-<br>angle<br>handpiece (CA<br>1:1, Bien-Air)<br>with a round<br>tungsten<br>carbide bur<br>(H1SM.204.02<br>0, Komet)<br>inside the<br>already<br>prepared<br>cavity. | 320,000<br>rpm.<br>50.000<br>rpm | Yes  | N/A | N/A                          | Yes | <b>Patient:</b> 14 sites on the<br>dental chair<br><b>Assistant:</b> 1 on the<br>assistant pad | Yes          | Dental chair unit:<br>instrument tray,<br>cuspidor cup, water<br>glass tray, overhead<br>dental unit light, foot<br>pedal.<br>Floor : 60,120,180,<br>240,360<br>Wall in front<br>(distance not clear,<br>>1).<br>The lateral column<br>(distance not clear)<br>The back wall<br>(distance not clear)<br>Ceiling (distance not<br>clear, >1<br>the cabinet (distance<br>not clear) | Yes | Bacteria      | Streptococcus<br>mutans                                |
| 91  | Larato<br>1966  | 1.5-5<br>mins. | air turbine<br>drill                                                                                                                                                                                                                                                                                                                                                             | N/A                              | YES? | Yes | Unit<br>aspirating<br>system | N/A | N/A                                                                                            | Air sampling | Air Sampler placed<br>on the bracket table<br>15 in. (anterior) to<br>and slightly below<br>the patient's<br>mouth                                                                                                                                                                                                                                                                | Yes | Bacteria<br>I | Hemolytic<br>Staphylococcus<br>albus,<br>Non hemolytic |

|     |                         |            |                                                                                                        |                     |     |     |                           |     |                                                                                                                                                                                   |     |                                                                                                                                                                                               |       |            |                                                                                               |
|-----|-------------------------|------------|--------------------------------------------------------------------------------------------------------|---------------------|-----|-----|---------------------------|-----|-----------------------------------------------------------------------------------------------------------------------------------------------------------------------------------|-----|-----------------------------------------------------------------------------------------------------------------------------------------------------------------------------------------------|-------|------------|-----------------------------------------------------------------------------------------------|
|     |                         |            |                                                                                                        |                     |     |     |                           |     |                                                                                                                                                                                   |     |                                                                                                                                                                                               |       |            | Staphylococcus albus, Alpha streptococcus (three most common/were exist in all of the sample) |
| 113 | Llandro 2021            | 10 minutes | * speed-increasing dental handpiece driven by a dental air motor at full speed (with no water coolant) |                     | Yes | yes | Large bore dental suction | Yes | <b>Operator:</b> forearms, chest, upper leg and head, their masks and full-face visor.<br><b>assistant:</b> forearms, chest, upper leg and head, their masks and full-face visor. | Yes | Eight-metre diameter around mannequin head . The filter papers were spaced at intervals of 0.5 m on eight four metre rods, arranged at 45-degree intervals around a dental training mannequin | Other | na         | na                                                                                            |
| 50  | Manarte - Monteiro 2013 | 1-4 hours  | Manual (endodontic) + high-speed handpieces                                                            | rotary action, with | Yes | Yes | Rubber dam                | NA  | NA                                                                                                                                                                                | Yes | Blood agar plates were placed at 1) 0.5 meter                                                                                                                                                 | Yes   | Bacteria I | Gram-positive                                                                                 |

|     |              |            |                                                                                                                                                            |                                    |      |     |                       |     |                                   |     |                                                                                                                                                                                                                                                                                                                                                         |       |            |       |
|-----|--------------|------------|------------------------------------------------------------------------------------------------------------------------------------------------------------|------------------------------------|------|-----|-----------------------|-----|-----------------------------------|-----|---------------------------------------------------------------------------------------------------------------------------------------------------------------------------------------------------------------------------------------------------------------------------------------------------------------------------------------------------------|-------|------------|-------|
|     |              |            | (turbine) (for endodontic & restorative)                                                                                                                   | water-cooling;                     |      |     |                       |     |                                   |     | 2) 2 meter from the patient head position                                                                                                                                                                                                                                                                                                               |       |            | cocci |
| 90  | Miller 1971  | 20 seconds | Air turbine Handspeed+ 557 bur (multiple procedures). Rubber cup and pumice (periodontics)                                                                 | N/A                                | YES? | Yes | High velocity suction | No  | N/A                               | Yes | Five wooded battens were installed on a plane 0.92 meter (3 feet) above the floor in a pattern radiating from a point 0.304 meter (1 foot) below the patient's mouth to the sides and end of the room. These battens were mounted to rotate on their long axes and were fitted with suction cups at 0.304 meter (1 foot) intervals along their lengths. | Yes   | Bacteria I | N/A   |
| 115 | Nulty 2020   | 1 Minutes  | Electric Micromotor: "Micromotor high-speed handpiece with water"Mirco motor<br>Air turbine: HIGH SPEED WITH WATER<br>Low speed with water<br>Three-in-one |                                    | Yes  | yes | saliva ejector        | no  | N/A                               | yes | air sampler placed 420 mm to the right of the phantom head                                                                                                                                                                                                                                                                                              | Other | na         | na    |
| 60  | Purohit 2009 | N/A        | Prophylaxis was carried out with a Magnetostrictive scaler                                                                                                 | Prophylaxis was carried out with a | Yes  | No  | N/A                   | Yes | Operator: chest<br>Patient: chest | Yes | Mimicking Bentley et al. model (ID: 8) : headrest extension device at a distance of 12 inches and 24                                                                                                                                                                                                                                                    | Yes   | Bacteria I | N/A   |

|  |  |  |                                                                                                                                                                                                                                                                 |                                                                                                                                                                                                                                                                                              |  |  |  |  |  |  |                                            |  |  |  |
|--|--|--|-----------------------------------------------------------------------------------------------------------------------------------------------------------------------------------------------------------------------------------------------------------------|----------------------------------------------------------------------------------------------------------------------------------------------------------------------------------------------------------------------------------------------------------------------------------------------|--|--|--|--|--|--|--------------------------------------------|--|--|--|
|  |  |  | <p>working at a speed of 30 kHz, with a water pressure of 0.3 MPa during each treatment. A high speed air turbine handpiece, working at a speed of 400,000 rpm and with an air drive pressure of 0.25 MPa was used for preparing cavities on carious teeth.</p> | <p>Magnet ostrictiv e scaler working at a speed of 30 kHz, with a water pressure of 0.3 MPa during each treatme nt. A high speed air turbine handpie ce, working at a speed of 400,000 rpm and with an air drive pressure of 0.25 MPa was used for preparin g cavities on carious teeth.</p> |  |  |  |  |  |  | <p>inches away from the operating area</p> |  |  |  |
|--|--|--|-----------------------------------------------------------------------------------------------------------------------------------------------------------------------------------------------------------------------------------------------------------------|----------------------------------------------------------------------------------------------------------------------------------------------------------------------------------------------------------------------------------------------------------------------------------------------|--|--|--|--|--|--|--------------------------------------------|--|--|--|

|     |                          |                 |                                                                                                                                                                                      |                |     |               |                                                                      |     |                                           |              |                                                                                                                                                                                                                                                                                                                                                                                                                                                                   |     |               |                   |
|-----|--------------------------|-----------------|--------------------------------------------------------------------------------------------------------------------------------------------------------------------------------------|----------------|-----|---------------|----------------------------------------------------------------------|-----|-------------------------------------------|--------------|-------------------------------------------------------------------------------------------------------------------------------------------------------------------------------------------------------------------------------------------------------------------------------------------------------------------------------------------------------------------------------------------------------------------------------------------------------------------|-----|---------------|-------------------|
| 63  | Rautema<br>2006          | 40<br>minutes   | High speed<br>rotating<br>instrument<br>(for the<br>restorative<br>treatment).<br>No equipment<br>details were<br>provided<br>regarding<br>(endodontic/p<br>eriodontic)<br>treatment | Not<br>stated  | N/A | No            | N/A                                                                  | Yes | Operator: mask<br>Dental Assisstant: mask | Yes          | Plates were placed in<br>six different sectors<br>0.5- 2 meter from the<br>patient:<br><br>1) 2 plates in front of<br>the patient at a<br>distance of 2 meter.<br>2) 1 plate behind the<br>patient at 0.5 meter.<br>3) 1 plate behind<br>assisnt side (patient<br>left hand side ) at 1.5<br>meter.<br>4) 2 plates behind<br>the operator side<br>(patient right hand<br>side) at 1.5 meter<br>and the surgery<br>compture location<br>(no distance<br>reported). | Yes | Bacteria<br>I | airb<br>orne      |
| 88  | Samaran<br>ayake<br>1989 | 5-15<br>mins.   | Not stated                                                                                                                                                                           | Not<br>stated  | Yes | Not<br>stated | Not stated                                                           | No  | N/A                                       | Yes          | 1, 2 and 3 meters<br>from the headrest of<br>the dental chair                                                                                                                                                                                                                                                                                                                                                                                                     | Yes | Bacteria<br>I | Airb<br>orne      |
| 128 | Shahdad<br>2021          | 20<br>minutes   | air turbine<br>(W&H Synea<br>Turbine TA-<br>98LED,<br>Bürmoos,<br>Austria)                                                                                                           | 360.000r<br>pm | Yes | Yes           | high-<br>volume<br>suction<br>(HVS) and a<br>saliva<br>ejector (SE). | No  | NA                                        | Air Sampling | The sampling inlets<br>placed adjacent to<br>the manikin's mouth<br>in the 7 o'clock<br>position (8 cm from<br>tooth 21                                                                                                                                                                                                                                                                                                                                           | No  | N/A           | N/A               |
| 94  | Tag El-<br>Din 1997      | 5-15<br>minutes | air-turbine-<br>driven<br>handpiece                                                                                                                                                  | Air<br>driven  | Yes | Yes           | with and<br>without<br>rubber dam                                    | Yes | Patient: chest                            | Yes          | 1) 3 plates on the left<br>and right sides and<br>behind the patient<br>(All placed<br>equidistantly from<br>the child's head).<br><br>2) 1 metre; and                                                                                                                                                                                                                                                                                                            | Yes | Bacteria<br>I | Not<br>stat<br>ed |

|    |             |            |                                                      |            |     |     |                                                          |    |     |              |                                                                                                                                       |       |     |     |
|----|-------------|------------|------------------------------------------------------|------------|-----|-----|----------------------------------------------------------|----|-----|--------------|---------------------------------------------------------------------------------------------------------------------------------------|-------|-----|-----|
|    |             |            |                                                      |            |     |     |                                                          |    |     |              | 3) 2 metres from the head-rest of the dental chair (to further details on distance were reported).                                    |       |     |     |
| 87 | Yamada 2011 | Not stated | High speed rotating instrument and ultrasonic scaler | Not stated | Yes | Yes | High volume evacuator systems (2 at different locations) | No | N/A | Air sampling | Blood contaminated aerosol released in the atmospheric air<br>1) 50 cm away from patient mouth.<br>2) 100 cm away from patient mouth. | Other | N/A | N/A |

| Unique Study ID | Study author and reference | If the duration of the procedure was stated, please enter it here                          | If applicable, what was the main equipment used in performing the procedure? (e.g. rotary handpiece, ultrasonic scaler) | If stated and considered relevant, what was the working mechanism and/or the rotation/vibration speed of the main equipment used | Is the equipment used in performing the dental procedure relevant to today's practice (Please choose from the dropdown list Yes, No, N/A) | Was any additional equipments used as a standard measure e.g. rubber dam, suction) (Please choose from the dropdown list Yes, No, N/A) | If yes, Please specify in here                                                                           | Person e.g. dental operator, dental nurse/ assistant, patient (choose from dropdown list; Yes, No, N/A) |
|-----------------|----------------------------|--------------------------------------------------------------------------------------------|-------------------------------------------------------------------------------------------------------------------------|----------------------------------------------------------------------------------------------------------------------------------|-------------------------------------------------------------------------------------------------------------------------------------------|----------------------------------------------------------------------------------------------------------------------------------------|----------------------------------------------------------------------------------------------------------|---------------------------------------------------------------------------------------------------------|
| 99              | Ahmed 2021                 | 3 minutes                                                                                  | <b>Two-hole</b><br>AA87handpiece (PANA MAX, NSK, Tochigi, Japan)<br>- four-hole handpiece (KAVO, Biberach, Germany).    | high-speed handpiece                                                                                                             | Yes                                                                                                                                       | Yes                                                                                                                                    | High volume suction (DSEplus Type 5193, KAVO, Warthausen, Germany)                                       | Yes                                                                                                     |
| 100             | Allison 2021(a)            | High Speed Air Turbine = 10mins 3-in-1 Spray = 30 seconds (replicate washing acid etchant) | <b>Air</b> turbine - Synea TA-98, W&H (UK) LTD and 3-in-1 Spray = Model not stated                                      | high- speed handpiece. 3-in1 = air and water 140.6mL / min                                                                       | yes                                                                                                                                       | Yes                                                                                                                                    | Suction for 3-in-1 measure at 6.3L of water per minute. Measured with and without suction for high speed | Yes - simulated body of Mannequin and Operator and Assistant                                            |

|     |                     |                                                                                                                                                 |                                                                     |                                                                                                                                                                                                 |      |     |                                                                                                                                                                          |                                                              |
|-----|---------------------|-------------------------------------------------------------------------------------------------------------------------------------------------|---------------------------------------------------------------------|-------------------------------------------------------------------------------------------------------------------------------------------------------------------------------------------------|------|-----|--------------------------------------------------------------------------------------------------------------------------------------------------------------------------|--------------------------------------------------------------|
| 120 | Allison 2021(b)     | 10 minutes                                                                                                                                      | A speed-increasing handpiece (no water) High-speed                  | Highspeed: Approx: 400.000rpm<br>Micromotor: 60.000rpm;<br>120.000rpm;<br>200.000rpm                                                                                                            | yes  | yes | suction (flow rate 105l/min)                                                                                                                                             | Yes - simulated body of Mannequin and Operator and Assistant |
| 127 | Allison 2021(c)     | 10 minutes                                                                                                                                      | High-speed air-turbine (Synea TA-98, W&H (UK) Ltd.; St Albans, UK). | no                                                                                                                                                                                              | yes  | yes | medium volume suction (dental suction with an 8.3 mm internal diameter suction tip at a flow rate of 133 L/min)                                                          | Yes                                                          |
| 93  | Belting 1964        | 1 minute                                                                                                                                        | Air rotor                                                           | The dental air rotor (Borden Airotor, Ritter Co., Inc., Rochester, N. Y.) with no. 171 bur attached operating at an air flow pressure of 30 psi using 30 drops of oil and 18ml water per minute | YES? | Yes | air rotor was used with and without water                                                                                                                                | No                                                           |
| 8   | Bentley 1994        | Experiment 1) 2 minutes (spatter)<br>Experiment 2a) 30 minutes (aerosol with high speed)<br>Experiment 2b))30 minutes (aerosol with ultrasonic) | 1) high speed handpiece<br>2 high speed handpiece                   | Not stated                                                                                                                                                                                      | Yes  | Yes | 1) High volume aspirator with high speed handpiece<br>tooth preparation 2a) high volume aspirator with high speed handpiece<br>2b) saliva ejector with ultrasonic scaler | Yes                                                          |
| 29  | Grenier 1995        | High-speed drilling= 8 minutes                                                                                                                  | High speed handpiece                                                | not stated                                                                                                                                                                                      | Yes  | Yes | rubber dam                                                                                                                                                               | No                                                           |
| 122 | Grzech-Lesniak 2021 | NA                                                                                                                                              | highspeed handpiece W&H Synea TA-98LC (W&H, Bürmoos, Austria)       | 200,000rpm<br>15,000rpm                                                                                                                                                                         | Yes  | Yes | 1) saliva ejector (SE) EM15 (Monoart® Euronda, Vicenza,                                                                                                                  | Yes                                                          |

|     |               |                                                          |                                                                                                                                                                        |                            |     |                                                                                                                       |                                                                                                                                                                               |     |
|-----|---------------|----------------------------------------------------------|------------------------------------------------------------------------------------------------------------------------------------------------------------------------|----------------------------|-----|-----------------------------------------------------------------------------------------------------------------------|-------------------------------------------------------------------------------------------------------------------------------------------------------------------------------|-----|
|     |               |                                                          | low-speed handpiece<br>W&H Synea TA-98LC<br>(W&H, Bürmoos, Austria)                                                                                                    |                            |     |                                                                                                                       | Italy) and (2) high-volume evacuator (HVE) EM19 EVO (Monoart® Euronda, Vicenza, Italy).<br>Evacuators were placed at the level of the tooth around 2 cm from its buccal side. |     |
| 107 | Han 2021      | Low speed: 5 min<br>Highspeed: 5s<br>triple syringe: 15s | Air turbine handpiece<br>(TiMax, NSK, Kanuma, Japan)<br>low-speed air turbine handpiece (W&H implantMED™, Bürmoos, Austria)<br><br>Triple syringe                      | 300,000 rpm<br>1200 rpm    | Yes | None                                                                                                                  | N/A                                                                                                                                                                           | Yes |
| 36  | Hausler 1966  | not clear                                                | high speed handpiece and air turbine                                                                                                                                   | 2.000 rpm                  | No  | No                                                                                                                    | This is an old study, here is relevance bt the handpieces etc may not be the same                                                                                             | No  |
| 108 | Holliday 2021 | 10 minutes                                               | Highspeed Hand piece.                                                                                                                                                  | not stated                 | Yes | Dental suction at two flow rates:<br>low volume suction, 40 L/min of air;<br>medium volume suction, 159 L/min of air. |                                                                                                                                                                               | No  |
| 109 | Ionescu 2020  | 4 minutes                                                | * Highspeed: Air turbine handpiece (Bora Led, Bien-Air Dental) equipped with a cylindrical diamond bur (835KR.314.016, Komet Italia Srl).<br><br>**Slow-speed: contra- | 320,000 rpm.<br>50.000 rpm | Yes | N/A                                                                                                                   | N/A                                                                                                                                                                           | Yes |

|     |                       |             |                                                                                                                                                            |                                                                                                                                                                                      |      |     |                           |     |
|-----|-----------------------|-------------|------------------------------------------------------------------------------------------------------------------------------------------------------------|--------------------------------------------------------------------------------------------------------------------------------------------------------------------------------------|------|-----|---------------------------|-----|
|     |                       |             | angle handpiece (CA 1:1, Bien-Air) with a round tungsten carbide bur (H1SM.204.020, Komet) inside the already prepared cavity.                             |                                                                                                                                                                                      |      |     |                           |     |
| 91  | Larato 1966           | 1.5-5 mins. | air turbine drill                                                                                                                                          | N/A                                                                                                                                                                                  | YES? | Yes | Unit aspirating system    | N/A |
| 113 | Llandro 2021          | 10 minutes  | * speed-increasing dental handpiece driven by a dental air motor at full speed (with no water coolant)                                                     |                                                                                                                                                                                      | Yes  | yes | Large bore dental suction | Yes |
| 50  | Manarte-Monteiro 2013 | 1-4 hours   | Manual (endodontic) + high-speed handpieces (turbine) (for endodontic & restorative)                                                                       | rotary action, with water-cooling;                                                                                                                                                   | Yes  | Yes | Rubber dam                | NA  |
| 90  | Miller 1971           | 20 seconds  | Air turbine Handspeed+ 557 bur (multiple procedures). Rubber cup and pumice (periodontics).                                                                | N/A                                                                                                                                                                                  | YES? | Yes | High velocity suction     | No  |
| 115 | Nulty 2020            | 1 Minutes   | Electric Micromotor: "Micromotor high-speed handpiece with water"<br>Mircomotor Air turbine: HIGH SPEED WITH WATER<br>Low speed with water<br>Three-in-one |                                                                                                                                                                                      | Yes  | yes | saliva ejector            | no  |
| 60  | Purohit 2009          | N/A         | Prophylaxis was carried out with a Magnetostrictive scaler working at a speed of 30 kHz, with a water pressure of 0.3 MPa                                  | Prophylaxis was carried out with a Magnetostrictive scaler working at a speed of 30 kHz, with a water pressure of 0.3 MPa during each treatment. A high speed air turbine handpiece, | Yes  | No  | N/A                       | Yes |

|     |                   |              |                                                                                                                                                                                           |                                                                                                                                |     |            |                                                          |     |
|-----|-------------------|--------------|-------------------------------------------------------------------------------------------------------------------------------------------------------------------------------------------|--------------------------------------------------------------------------------------------------------------------------------|-----|------------|----------------------------------------------------------|-----|
|     |                   |              | during each treatment. A high speed air turbine handpiece, working at a speed of 400,000 rpm and with an air drive pressure of 0.25 MPa was used for preparing cavities on carious teeth. | working at a speed of 400,000 rpm and with an air drive pressure of 0.25 MPa was used for preparing cavities on carious teeth. |     |            |                                                          |     |
| 63  | Rautemaa 2006     | 40 minutes   | High speed rotating instrument (for the restorative treatment). No equipment details were provided regarding (endodontic/periodontic) treatment                                           | Not stated                                                                                                                     | N/A | No         | N/A                                                      | Yes |
| 88  | Samaranayake 1989 | 5-15 mins.   | Not stated                                                                                                                                                                                | Not stated                                                                                                                     | Yes | Not stated | Not stated                                               | No  |
| 128 | Shahdad 2021      | 20 minutes   | air turbine (W&H Synea Turbine TA-98LED, Bürmoos, Austria)                                                                                                                                | 360.000rpm                                                                                                                     | Yes | Yes        | high-volume suction (HVS) and a saliva ejector (SE).     | No  |
| 94  | Tag El-Din 1997   | 5-15 minutes | air-turbine-driven handpiece                                                                                                                                                              | Air driven                                                                                                                     | Yes | Yes        | with and without rubber dam                              | Yes |
| 87  | Yamada 2011       | Not stated   | High speed rotating instrument and ultrasonic scaler                                                                                                                                      | Not stated                                                                                                                     | Yes | Yes        | High volume evacuator systems (2 at different locations) | No  |

| Unique Study ID | Study author and reference | If the duration of the procedure was stated, please enter it here | If applicable, what was the main equipment used in performing the procedure? (e.g. rotary handpiece, ultrasonic scaler) | If stated and considered relevant, what was the working mechanism and/or the rotation/vibration speed of the main equipment used | Is the equipment used in performing the dental procedure relevant to today's practice (Please choose from the dropdown list Yes, No, N/A) | Was any additional equipments used as a standard measure e.g. rubber dam, suction) (Please choose from the dropdown list Yes, No, N/A) |
|-----------------|----------------------------|-------------------------------------------------------------------|-------------------------------------------------------------------------------------------------------------------------|----------------------------------------------------------------------------------------------------------------------------------|-------------------------------------------------------------------------------------------------------------------------------------------|----------------------------------------------------------------------------------------------------------------------------------------|
|-----------------|----------------------------|-------------------------------------------------------------------|-------------------------------------------------------------------------------------------------------------------------|----------------------------------------------------------------------------------------------------------------------------------|-------------------------------------------------------------------------------------------------------------------------------------------|----------------------------------------------------------------------------------------------------------------------------------------|

|     |                 |                                                                                               |                                                                                                            |                                                                                                                                                                                                 |      |     |
|-----|-----------------|-----------------------------------------------------------------------------------------------|------------------------------------------------------------------------------------------------------------|-------------------------------------------------------------------------------------------------------------------------------------------------------------------------------------------------|------|-----|
| 99  | Ahmed 2021      | 3 minutes                                                                                     | Two-hole AA87handpiece (PANA MAX, NSK, Tochigi, Japan)<br>- four-hole handpiece (KAVO, Biberach, Germany). | high-speed handpiece                                                                                                                                                                            | Yes  | Yes |
| 100 | Allison 2021(a) | High Speed Air Turbine = 10mins 3-in-1<br>Spray = 30 seconds (replicate washing acid etchant) | Air turbine - Synea TA-98, W&H (UK) LTD and 3-in-1 Spray =<br>Model not stated                             | high- speed handpiece.<br>3-in1 = air and water<br>140.6mL / min                                                                                                                                | yes  | Yes |
| 120 | Allison 2021(b) | 10 minutes                                                                                    | A speed-increasing handpiece (no water)<br>High-speed                                                      | Highspeed: Approx:<br>400.000rpm<br><br>Micromotor:<br>60.000rpm;<br>120.000rpm;<br>200.000rpm                                                                                                  | yes  | yes |
| 127 | Allison 2021(c) | 10 minutes                                                                                    | High-speed air-turbine (Synea TA-98, W&H (UK) Ltd.; St Albans, UK).                                        | no                                                                                                                                                                                              | yes  | yes |
| 93  | Belting 1964    | 1 minute                                                                                      | Air rotor                                                                                                  | The dental air rotor (Borden Airotor, Ritter Co., Inc., Rochester, N. Y.) with no. 171 bur attached operating at an air flow pressure of 30 psi using 30 drops of oil and 18ml water per minute | YES? | Yes |

|     |                     |                                                                                                                                             |                                                                                                                                                 |                         |     |      |
|-----|---------------------|---------------------------------------------------------------------------------------------------------------------------------------------|-------------------------------------------------------------------------------------------------------------------------------------------------|-------------------------|-----|------|
| 8   | Bentley 1994        | Experiment 1) 2 minutes (spatter)<br>Experiment 2a) 30 minutes (aerosol with high speed Experiment 2b))30 minutes (aerosol with ultrasonic) | 1) high speed handpiece 2 high speed handpiece                                                                                                  | Not stated              | Yes | Yes  |
| 29  | Grenier 1995        | High-speed drilling= 8 minutes                                                                                                              | High speed handpiece                                                                                                                            | not stated              | Yes | Yes  |
| 122 | Grzech-Lesniak 2021 | NA                                                                                                                                          | highspeed handpiece W&H Synea TA-98LC (W&H, Bürmoos, Austria)<br>low-speed handpiece W&H Synea TA-98LC (W&H, Bürmoos, Austria)                  | 200,000rpm<br>15,000rpm | Yes | Yes  |
| 107 | Han 2021            | Low speed: 5 min<br>Highspeed: 5s<br>triple syringe: 15s                                                                                    | Air turbine handpiece ((TiMax, NSK, Kanuma, Japan)<br>low-speed air turbine handpiece (W&H implantMED™, Bürmoos, Austria)<br><br>Triple syringe | 300,000 rpm<br>1200 rpm | Yes | None |
| 36  | Hausler 1966        | not clear                                                                                                                                   | high speed handpiece and air turbine                                                                                                            | 2.000 rpm               | No  | No   |

|     |                       |             |                                                                                                                                                                                                                                                                                                      |                                    |      |                                                                                                                       |
|-----|-----------------------|-------------|------------------------------------------------------------------------------------------------------------------------------------------------------------------------------------------------------------------------------------------------------------------------------------------------------|------------------------------------|------|-----------------------------------------------------------------------------------------------------------------------|
| 108 | Holliday 2021         | 10 minutes  | Highspeed Hand piece.                                                                                                                                                                                                                                                                                | not stated                         | Yes  | Dental suction at two flow rates:<br>low volume suction, 40 L/min of air;<br>medium volume suction, 159 L/min of air. |
| 109 | Ionescu 2020          | 4 minutes   | * Highspeed: Air turbine handpiece (Bora Led, Bien-Air Dental) equipped with a cylindrical diamond bur (835KR.314.016, Komet Italia Srl).<br><br>**Slow-speed: contra-angle handpiece (CA 1:1, Bien-Air) with a round tungsten carbide bur (H1SM.204.020, Komet) inside the already prepared cavity. | 320,000 rpm.<br>50.000 rpm         | Yes  | N/A                                                                                                                   |
| 91  | Larato 1966           | 1.5-5 mins. | air turbine drill                                                                                                                                                                                                                                                                                    | N/A                                | YES? | Yes                                                                                                                   |
| 113 | Llandro 2021          | 10 minutes  | * speed-increasing dental handpiece driven by a dental air motor at full speed (with no water coolant)                                                                                                                                                                                               |                                    | Yes  | yes                                                                                                                   |
| 50  | Manarte-Monteiro 2013 | 1-4 hours   | Manual (endodontic) + high-speed handpieces (turbine) (for endodontic & restorative)                                                                                                                                                                                                                 | rotary action, with water-cooling; | Yes  | Yes                                                                                                                   |
| 90  | Miller 1971           | 20 seconds  | Air turbine Handspeed+ 557 bur (multiple procedures). Rubber cup and pumice (periodontics).                                                                                                                                                                                                          | N/A                                | YES? | Yes                                                                                                                   |

|     |                   |              |                                                                                                                                                                                                                                                                                                                     |                                                                                                                                                                                                                                                                                                                     |     |            |
|-----|-------------------|--------------|---------------------------------------------------------------------------------------------------------------------------------------------------------------------------------------------------------------------------------------------------------------------------------------------------------------------|---------------------------------------------------------------------------------------------------------------------------------------------------------------------------------------------------------------------------------------------------------------------------------------------------------------------|-----|------------|
| 115 | Nulty 2020        | 1 Minutes    | Electric Micromotor: "<br>Micromotor high-speed<br>handpiece with<br>water"Mircomotor<br>Air turbine: HIGH SPEED WITH<br>WATER<br>Low speed with water<br>Three-in-one                                                                                                                                              |                                                                                                                                                                                                                                                                                                                     | Yes | yes        |
| 60  | Purohit 2009      | N/A          | Prophylaxis was carried out with a Magnetostrictive scaler working at a speed of 30 kHz, with a water pressure of 0.3 MPa during each treatment. A high speed air turbine handpiece, working at a speed of 400,000 rpm and with an air drive pressure of 0.25 MPa was used for preparing cavities on carious teeth. | Prophylaxis was carried out with a Magnetostrictive scaler working at a speed of 30 kHz, with a water pressure of 0.3 MPa during each treatment. A high speed air turbine handpiece, working at a speed of 400,000 rpm and with an air drive pressure of 0.25 MPa was used for preparing cavities on carious teeth. | Yes | No         |
| 63  | Rautemaa 2006     | 40 minutes   | High speed rotating instrument (for the restorative treatment). No equipment details were provided regarding (endodontic/periodontic) treatment                                                                                                                                                                     | Not stated                                                                                                                                                                                                                                                                                                          | N/A | No         |
| 88  | Samaranayake 1989 | 5-15 mins.   | Not stated                                                                                                                                                                                                                                                                                                          | Not stated                                                                                                                                                                                                                                                                                                          | Yes | Not stated |
| 128 | Shahdad 2021      | 20 minutes   | air turbine (W&H Synea Turbine TA-98LED, Bürmoos, Austria)                                                                                                                                                                                                                                                          | 360.000rpm                                                                                                                                                                                                                                                                                                          | Yes | Yes        |
| 94  | Tag El-Din 1997   | 5-15 minutes | air-turbine-driven handpiece                                                                                                                                                                                                                                                                                        | Air driven                                                                                                                                                                                                                                                                                                          | Yes | Yes        |
| 87  | Yamada 2011       | Not stated   | High speed rotating instrument and ultrasonic scaler                                                                                                                                                                                                                                                                | Not stated                                                                                                                                                                                                                                                                                                          | Yes | Yes        |

| Unique Study ID | Study author and reference | If the duration of the procedure was stated, please enter it here                          | If applicable, what was the main equipment used in performing the procedure? (e.g.rotary handpiece, ultrasonic scaler) | If stated and considered relevant, what was the working mechanism and/or the rotation/vibration speed of the main equipment used                | Is the equipment used in performing the dental procedure relevant to today's practice (Please choose from the dropdown list Yes, No, N/A) |
|-----------------|----------------------------|--------------------------------------------------------------------------------------------|------------------------------------------------------------------------------------------------------------------------|-------------------------------------------------------------------------------------------------------------------------------------------------|-------------------------------------------------------------------------------------------------------------------------------------------|
| 99              | Ahmed 2021                 | 3 minutes                                                                                  | Two-hole AA87handpiece (PANA MAX, NSK, Tochigi, Japan)<br>- four-hole handpiece (KAVO, Biberach, Germany).             | high-speed handpiece                                                                                                                            | Yes                                                                                                                                       |
| 100             | Allison 2021(a)            | High Speed Air Turbine = 10mins 3-in-1 Spray = 30 seconds (replicate washing acid etchant) | Air turbine - Synea TA-98, W&H (UK) LTD and 3-in-1 Spray = Model not stated                                            | high- speed handpiece. 3-in1 = air and water 140.6mL / min                                                                                      | yes                                                                                                                                       |
| 120             | Allison 2021(b)            | 10 minutes                                                                                 | A speed-increasing handpiece (no water) High-speed                                                                     | Highspeed: Approx: 400.000rpm<br><br>Micromotor: 60.000rpm;<br>120.000rpm;<br>200.000rpm                                                        | yes                                                                                                                                       |
| 127             | Allison 2021(c)            | 10 minutes                                                                                 | High-speed air-turbine (Synea TA-98, W&H (UK) Ltd.; St Albans, UK).                                                    | no                                                                                                                                              | yes                                                                                                                                       |
| 93              | Belting 1964               | 1 minute                                                                                   | Air rotor                                                                                                              | The dental air rotor (Borden Airotor, Ritter Co., Inc., Rochester, N. Y.) with no. 171 bur attached operating at an air flow pressure of 30 psi | YES?                                                                                                                                      |

|     |                     |                                                                                                                                                |                                                                                                                                                                                                                                   |                                                 |            |
|-----|---------------------|------------------------------------------------------------------------------------------------------------------------------------------------|-----------------------------------------------------------------------------------------------------------------------------------------------------------------------------------------------------------------------------------|-------------------------------------------------|------------|
|     |                     |                                                                                                                                                |                                                                                                                                                                                                                                   | using 30 drops of oil and 18ml water per minute |            |
| 8   | Bentley 1994        | Experiment 1) 2 minutes (spatter)<br>Experiment 2a) 30 minutes (aerosol with high speed<br>Experiment 2b))30 minutes (aerosol with ultrasonic) | 1) high speed handpiece 2 high speed handpiece                                                                                                                                                                                    | Not stated                                      | Yes        |
| 29  | Grenier 1995        | High-speed drilling= 8 minutes                                                                                                                 | High speed handpiece                                                                                                                                                                                                              | not stated                                      | Yes        |
| 122 | Grzech-Lesniak 2021 | NA                                                                                                                                             | highspeed handpiece W&H Synea TA-98LC (W&H, Bürmoos, Austria)<br>low-speed handpiece W&H Synea TA-98LC (W&H, Bürmoos, Austria)                                                                                                    | 200,000rpm<br>15,000rpm                         | Yes        |
| 107 | Han 2021            | Low speed: 5 min<br>Highspeed: 5s<br>triple syringe: 15s                                                                                       | Air turbine handpiece ((TiMax, NSK, Kanuma, Japan)<br>low-speed air turbine handpiece (W&H implantMED™, Bürmoos, Austria)<br><br>Triple syringe                                                                                   | 300,000 rpm<br>1200 rpm                         | Yes        |
| 36  | Hausler 1966        | not clear                                                                                                                                      | high speed handpiece and air turbine                                                                                                                                                                                              | 2.000 rpm                                       | No         |
| 108 | Holliday 2021       | 10 minutes                                                                                                                                     | Highspeed Hand piece.                                                                                                                                                                                                             | not stated                                      | <u>Yes</u> |
| 109 | Ionescu 2020        | 4 minutes                                                                                                                                      | * Highspeed: Air turbine handpiece (Bora Led, Bien-Air Dental)<br>equipped with a cylindrical diamond bur (835KR.314.016, Komet Italia Srl).<br><br>**Slow-speed: contra-angle handpiece (CA 1:1, Bien-Air) with a round tungsten | 320,000 rpm.<br>50.000 rpm                      | Yes        |

|     |                       |             |                                                                                                                                                                                                                                                                                                                            |                                                                                                                                                                                                                                                                       |      |
|-----|-----------------------|-------------|----------------------------------------------------------------------------------------------------------------------------------------------------------------------------------------------------------------------------------------------------------------------------------------------------------------------------|-----------------------------------------------------------------------------------------------------------------------------------------------------------------------------------------------------------------------------------------------------------------------|------|
|     |                       |             | carbide bur (H1SM.204.020, Komet) inside the already prepared cavity.                                                                                                                                                                                                                                                      |                                                                                                                                                                                                                                                                       |      |
| 91  | Larato 1966           | 1.5-5 mins. | air turbine drill                                                                                                                                                                                                                                                                                                          | N/A                                                                                                                                                                                                                                                                   | YES? |
| 113 | Llandro 2021          | 10 minutes  | * speed-increasing dental handpiece driven by a dental air motor at full speed (with <b>no water</b> coolant)                                                                                                                                                                                                              |                                                                                                                                                                                                                                                                       | Yes  |
| 50  | Manarte-Monteiro 2013 | 1-4 hours   | Manual (endodontic) + high-speed handpieces (turbine) (for (endodontic & restorative)                                                                                                                                                                                                                                      | rotary action, with water-cooling;                                                                                                                                                                                                                                    | Yes  |
| 90  | Miller 1971           | 20 seconds  | Air turbine Handspeed+ 557 bur (multiple procedures). Rubber cup and pumice (periodontics).                                                                                                                                                                                                                                | N/A                                                                                                                                                                                                                                                                   | YES? |
| 115 | Nulty 2020            | 1 Minutes   | Electric Micromotor: " Micromotor high-speed handpiece with water"<br>Mircomotor<br>Air turbine: HIGH SPEED WITH WATER<br>Low speed with water<br>Three-in-one                                                                                                                                                             |                                                                                                                                                                                                                                                                       | Yes  |
| 60  | Purohit 2009          | N/A         | <b>Prophylaxis</b> was carried out with a Magnetostrictive scaler working at a speed of 30 kHz, with a water pressure of 0.3 MPa during each treatment. A high speed air turbine handpiece, working at a speed of 400,000 rpm and with an air drive pressure of 0.25 MPa was used for preparing cavities on carious teeth. | Prophylaxis was carried out with a Magnetostrictive scaler working at a speed of 30 kHz, with a water pressure of 0.3 MPa during each treatment. A high speed air turbine handpiece, working at a speed of 400,000 rpm and with an air drive pressure of 0.25 MPa was | Yes  |

|     |                   |              |                                                                                                                                                 |                                               |     |
|-----|-------------------|--------------|-------------------------------------------------------------------------------------------------------------------------------------------------|-----------------------------------------------|-----|
|     |                   |              |                                                                                                                                                 | used for preparing cavities on carious teeth. |     |
| 63  | Rautemaa 2006     | 40 minutes   | High speed rotating instrument (for the restorative treatment). No equipment details were provided regarding (endodontic/periodontic) treatment | Not stated                                    | N/A |
| 88  | Samaranayake 1989 | 5-15 mins.   | Not stated                                                                                                                                      | Not stated                                    | Yes |
| 128 | Shahdad 2021      | 20 minutes   | air turbine (W&H Synea Turbine TA-98LED, Bürmoos, Austria)                                                                                      | 360.000rpm                                    | Yes |
| 94  | Tag El-Din 1997   | 5-15 minutes | air-turbine-driven handpiece                                                                                                                    | Air driven                                    | Yes |
| 87  | Yamada 2011       | Not stated   | High speed rotating instrument and ultrasonic scaler                                                                                            | Not stated                                    | Yes |

| Unique Study ID | Study author and reference | If the duration of the procedure was stated, please enter it here | If applicable, what was the main equipment used in performing the procedure? (e.g. rotary handpiece, ultrasonic scaler) | If stated and considered relevant, what was the working mechanism and/or the rotation/vibration speed of the main equipment used | Is the equipment used in performing the dental procedure relevant to today's practice (Please choose from the | Was any additional equipments used as a standard measure e.g. rubber dam, suction) (Please choose from the | If yes, Please specify in here | Person e.g. dental operator, dental nurse/assistant, patient (choose from dropdown list; Yes, No, N/A) | If Yes please specify who and which parts of body |
|-----------------|----------------------------|-------------------------------------------------------------------|-------------------------------------------------------------------------------------------------------------------------|----------------------------------------------------------------------------------------------------------------------------------|---------------------------------------------------------------------------------------------------------------|------------------------------------------------------------------------------------------------------------|--------------------------------|--------------------------------------------------------------------------------------------------------|---------------------------------------------------|
|-----------------|----------------------------|-------------------------------------------------------------------|-------------------------------------------------------------------------------------------------------------------------|----------------------------------------------------------------------------------------------------------------------------------|---------------------------------------------------------------------------------------------------------------|------------------------------------------------------------------------------------------------------------|--------------------------------|--------------------------------------------------------------------------------------------------------|---------------------------------------------------|

|     |                 |                                                                                               |                                                                                                            |                                                            | dropdown list Yes, No, N/A) | dropdown list Yes, No, N/A) |                                                                                                          |                                                              |                                                                                                                                      |
|-----|-----------------|-----------------------------------------------------------------------------------------------|------------------------------------------------------------------------------------------------------------|------------------------------------------------------------|-----------------------------|-----------------------------|----------------------------------------------------------------------------------------------------------|--------------------------------------------------------------|--------------------------------------------------------------------------------------------------------------------------------------|
| 99  | Ahmed 2021      | 3 minutes                                                                                     | Two-hole AA87handpiece (PANA MAX, NSK, Tochigi, Japan)<br>- four-hole handpiece (KAVO, Biberach, Germany). | high-speed handpiece                                       | Yes                         | Yes                         | High volume suction (DSEplus Type 5193, KAVO, Warthausen, Germany)                                       | Yes                                                          | operator chest, head, forearms, upper leg, and inside facemask.<br>assistant: chest, head, forearms, upper leg, and inside facemask. |
| 100 | Allison 2021(a) | High Speed Air Turbine = 10mins<br>3-in-1 Spray = 30 seconds (replicate washing acid etchant) | Air turbine - Synea TA-98, W&H (UK) LTD and 3-in-1 Spray = Model not stated                                | high- speed handpiece. 3-in1 = air and water 140.6mL / min | yes                         | Yes                         | Suction for 3-in-1 measure at 6.3L of water per minute. Measured with and without suction for high speed | Yes - simulated body of Mannequin and Operator and Assistant | Above mannequin mouth. 4 papers on body of mannequin x2 40cm from hub and x2 80cm.<br><br><b>Assistant and Operator - upper mid</b>  |

|     |                 |            |                                                    |                                                                                     |     |     |                              |                                                              |                                                                                                                                                                                                                       |
|-----|-----------------|------------|----------------------------------------------------|-------------------------------------------------------------------------------------|-----|-----|------------------------------|--------------------------------------------------------------|-----------------------------------------------------------------------------------------------------------------------------------------------------------------------------------------------------------------------|
|     |                 |            |                                                    |                                                                                     |     |     |                              |                                                              | forearm, upper chest, upper mid-thigh, Full-face visor and vertex of the head. Additionally for anterior crown prep with suction plus assistant, 3 filter papers were placed on the mask (beneath a full-face visor). |
| 120 | Allison 2021(b) | 10 minutes | A speed-increasing handpiece (no water) High-speed | Hightspeed: Approx: 400.000rpm<br><br>Micromotor: 60.000rpm; 120.000rpm; 200.000rpm | yes | yes | suction (flow rate 105l/min) | Yes - simulated body of Mannequin and Operator and Assistant | Above mannequin mouth. 4 papers on body of mannequin x2 40cm from hub and x2 80cm. Assistant and Operator - upper mid                                                                                                 |

|     |                 |            |                                                                     |                                                                                            |      |     |                                                                                                                 |     |                                                                                                                                                                                                                       |
|-----|-----------------|------------|---------------------------------------------------------------------|--------------------------------------------------------------------------------------------|------|-----|-----------------------------------------------------------------------------------------------------------------|-----|-----------------------------------------------------------------------------------------------------------------------------------------------------------------------------------------------------------------------|
|     |                 |            |                                                                     |                                                                                            |      |     |                                                                                                                 |     | forearm, upper chest, upper mid-thigh, Full-face visor and vertex of the head. Additionally for anterior crown prep with suction plus assistant, 3 filter papers were placed on the mask (beneath a full-face visor). |
| 127 | Allison 2021(c) | 10 minutes | High-speed air-turbine (Synea TA-98, W&H (UK) Ltd.; St Albans, UK). | no                                                                                         | yes  | yes | medium volume suction (dental suction with an 8.3 mm internal diameter suction tip at a flow rate of 133 L/min) | Yes | Active air sampling:<br><b>Operator:</b> the left chest pocket                                                                                                                                                        |
| 93  | Belting 1964    | 1 minute   | Air rotor                                                           | The dental air rotor (Borden Airotor, Ritter Co., Inc., Rochester, N. Y.) with no. 171 bur | YES? | Yes | air rotor was used with and without water                                                                       | No  | N/A                                                                                                                                                                                                                   |

|    |              |                                                                                                                                                                              |                                                              |                                                                                                      |     |     |                                                                                                                                                                                         |     |                                                                                                                                     |
|----|--------------|------------------------------------------------------------------------------------------------------------------------------------------------------------------------------|--------------------------------------------------------------|------------------------------------------------------------------------------------------------------|-----|-----|-----------------------------------------------------------------------------------------------------------------------------------------------------------------------------------------|-----|-------------------------------------------------------------------------------------------------------------------------------------|
|    |              |                                                                                                                                                                              |                                                              | attached operating at an air flow pressure of 30 psi using 30 drops of oil and 18ml water per minute |     |     |                                                                                                                                                                                         |     |                                                                                                                                     |
| 8  | Bentley 1994 | <p><b>Experiment</b></p> <p>1) 2 minutes (spatter)</p> <p>Experiment 2a) 30 minutes (aerosol with high speed)</p> <p>Experiment 2b))30 minutes (aerosol with ultrasonic)</p> | <p>1) high speed handpiece</p> <p>2 high speed handpiece</p> | Not stated                                                                                           | Yes | Yes | <p>1) High volume aspirator with high speed handpiece tooth preparation</p> <p>2a) high volume aspirator with high speed handpiece</p> <p>2b) saliva ejector with ultrasonic scaler</p> | Yes | <p>Operator: headcaps, masks and gowns.</p> <p><b>Dental Assistant:</b> headcaps, masks and gowns.</p> <p><b>Patient:</b> chest</p> |
| 29 | Grenier 1995 | <p><b>High-speed</b> drilling= 8 minutes</p>                                                                                                                                 | High speed handpiece                                         | not stated                                                                                           | Yes | Yes | rubber dam                                                                                                                                                                              | No  | N/A                                                                                                                                 |

|     |                     |                                                          |                                                                                                                                                 |                         |     |                       |                                                                                                                                                                                                                                       |     |                                                                                                              |
|-----|---------------------|----------------------------------------------------------|-------------------------------------------------------------------------------------------------------------------------------------------------|-------------------------|-----|-----------------------|---------------------------------------------------------------------------------------------------------------------------------------------------------------------------------------------------------------------------------------|-----|--------------------------------------------------------------------------------------------------------------|
| 122 | Grzech-Lesniak 2021 | NA                                                       | highspeed handpiece W&H Synea TA-98LC (W&H, Bürmoos, Austria)<br>low-speed handpiece W&H Synea TA-98LC (W&H, Bürmoos, Austria)                  | 200,000rpm<br>15,000rpm | Yes | Yes                   | 1) saliva ejector (SE) EM15 (Monoart® Euronda, Vicenza, Italy) and (2) high-volume evacuator (HVE) EM19 EVO (Monoart® Euronda, Vicenza, Italy).<br>Evacuators were placed at the level of the tooth around 2 cm from its buccal side. | Yes | Operatore mouth: 2 cm away<br>Assistant: Mouth : 2cm away<br>Patient (simulated): mpuh                       |
| 107 | Han 2021            | Low speed: 5 min<br>Highspeed: 5s<br>triple syringe: 15s | Air turbine handpiece ((TiMax, NSK, Kanuma, Japan)<br>low-speed air turbine handpiece (W&H implantMED™, Bürmoos, Austria)<br><br>Triple syringe | 300,000 rpm<br>1200 rpm | Yes | None                  | N/A                                                                                                                                                                                                                                   | Yes | Operator: 20cm representing dentist position<br><b>Assisstant:</b> 29 cm representing the Assistant position |
| 36  | Hausler 1966        | not clear                                                | high speed handpiece and air turbine                                                                                                            | 2.000 rpm               | No  | No                    | This is an old study, here is relevance bt the handpieces etc may not be the same                                                                                                                                                     | No  | NA                                                                                                           |
| 108 | Holliday 2021       | 10 minutes                                               | Highspeed Hand piece.                                                                                                                           | not stated              | Yes | Dental suction at two |                                                                                                                                                                                                                                       | No  | na                                                                                                           |

|     |              |           |                                                                                                                                                                                                                                                                                                             |                            |     |                                                                                                 |     |     |                                                                                               |
|-----|--------------|-----------|-------------------------------------------------------------------------------------------------------------------------------------------------------------------------------------------------------------------------------------------------------------------------------------------------------------|----------------------------|-----|-------------------------------------------------------------------------------------------------|-----|-----|-----------------------------------------------------------------------------------------------|
|     |              |           |                                                                                                                                                                                                                                                                                                             |                            |     | flow rates:<br>low volume suction, 40 L/min of air;<br>medium volume suction, 159 L/min of air. |     |     |                                                                                               |
| 109 | Ionescu 2020 | 4 minutes | <p>* Highspeed: Air turbine handpiece (Bora Led, Bien-Air Dental) equipped with a cylindrical diamond bur (835KR.314.016, Komet Italia Srl).</p> <p>**Slow-speed: contra-angle handpiece (CA 1:1, Bien-Air) with a round tungsten carbide bur (H1SM.204.020, Komet) inside the already prepared cavity.</p> | 320,000 rpm.<br>50.000 rpm | Yes | N/A                                                                                             | N/A | Yes | <p>Patient: 14 sites on the dental chair</p> <p><b>Assisstant:</b> 1 on the assistant pad</p> |

|     |                       |             |                                                                                                        |                                    |      |     |                           |     |                                                                                                                                                                            |
|-----|-----------------------|-------------|--------------------------------------------------------------------------------------------------------|------------------------------------|------|-----|---------------------------|-----|----------------------------------------------------------------------------------------------------------------------------------------------------------------------------|
| 91  | Larato 1966           | 1.5-5 mins. | air turbine drill                                                                                      | N/A                                | YES? | Yes | Unit aspirating system    | N/A | N/A                                                                                                                                                                        |
| 113 | Llandro 2021          | 10 minutes  | * speed-increasing dental handpiece driven by a dental air motor at full speed (with no water coolant) |                                    | Yes  | yes | Large bore dental suction | Yes | Operator: forearms, chest, upper leg and head, their masks and full-face visor.<br><b>assistant:</b> forearms, chest, upper leg and head, their masks and full-face visor. |
| 50  | Manarte-Monteiro 2013 | 1-4 hours   | Manual (endodontic) + high-speed handpieces (turbine) (for (endodontic & restorative)                  | rotary action, with water-cooling; | Yes  | Yes | Rubber dam                | NA  | NA                                                                                                                                                                         |
| 90  | Miller 1971           | 20 seconds  | Air turbine Handspeed+ 557 bur (multiple procedures). Rubber cup and pumice (periodontics).            | N/A                                | YES? | Yes | High velocity suction     | No  | N/A                                                                                                                                                                        |

|     |              |           |                                                                                                                                                                                                                                                                                                                                                            |                                                                                                                                                                                                                                                                                                                                                         |     |     |                |     |                                         |
|-----|--------------|-----------|------------------------------------------------------------------------------------------------------------------------------------------------------------------------------------------------------------------------------------------------------------------------------------------------------------------------------------------------------------|---------------------------------------------------------------------------------------------------------------------------------------------------------------------------------------------------------------------------------------------------------------------------------------------------------------------------------------------------------|-----|-----|----------------|-----|-----------------------------------------|
| 115 | Nulty 2020   | 1 Minutes | Electric Micromotor: "<br>Micromotor high-speed<br>handpiece with<br>water" Mircomotor<br>Air turbine: HIGH SPEED<br>WITH WATER<br>Low speed with water<br>Three-in-one                                                                                                                                                                                    |                                                                                                                                                                                                                                                                                                                                                         | Yes | yes | saliva ejector | no  | N/A                                     |
| 60  | Purohit 2009 | N/A       | Prophylaxis was carried<br>out with a<br>Magnetostrictive scaler<br>working at a speed of 30<br>kHz, with a water<br>pressure of 0.3 MPa<br>during each treatment. A<br>high speed air turbine<br>handpiece, working at a<br>speed of 400,000 rpm<br>and with an air drive<br>pressure of 0.25 MPa<br>was used for preparing<br>cavities on carious teeth. | Prophylaxis was<br>carried out with<br>a<br>Magnetostrictive<br>scaler working at<br>a speed of 30<br>kHz, with a<br>water pressure<br>of 0.3 MPa<br>during each<br>treatment. A<br>high speed air<br>turbine<br>handpiece,<br>working at a<br>speed of<br>400,000 rpm<br>and with an air<br>drive pressure of<br>0.25 MPa was<br>used for<br>preparing | Yes | No  | N/A            | Yes | Operator:<br>chest<br>Patient:<br>chest |

|     |                   |              |                                                                                                                                                 |                            |     |            |                                                          |     |                                           |
|-----|-------------------|--------------|-------------------------------------------------------------------------------------------------------------------------------------------------|----------------------------|-----|------------|----------------------------------------------------------|-----|-------------------------------------------|
|     |                   |              |                                                                                                                                                 | cavities on carious teeth. |     |            |                                                          |     |                                           |
| 63  | Rautemaa 2006     | 40 minutes   | High speed rotating instrument (for the restorative treatment). No equipment details were provided regarding (endodontic/periodontic) treatment | Not stated                 | N/A | No         | N/A                                                      | Yes | Operator: mask<br>Dental Assisstant: mask |
| 88  | Samaranayake 1989 | 5-15 mins.   | Not stated                                                                                                                                      | Not stated                 | Yes | Not stated | Not stated                                               | No  | N/A                                       |
| 128 | Shahdad 2021      | 20 minutes   | air turbine (W&H Synea Turbine TA-98LED, Bürmoos, Austria)                                                                                      | 360.000rpm                 | Yes | Yes        | high-volume suction (HVS) and a saliva ejector (SE).     | No  | NA                                        |
| 94  | Tag El-Din 1997   | 5-15 minutes | air-turbine-driven handpiece                                                                                                                    | Air driven                 | Yes | Yes        | with and without rubber dam                              | Yes | Patient: chest                            |
| 87  | Yamada 2011       | Not stated   | High speed rotating instrument and ultrasonic scaler                                                                                            | Not stated                 | Yes | Yes        | High volume evacuator systems (2 at different locations) | No  | N/A                                       |

| Unique Study ID | Study author and reference | If the duration of the procedure was stated, please enter it here | If applicable, what was the main equipment used in performing the procedure? (e.g.rotary handpiece, ultrasonic scaler) | If stated and considered relevant, what was the working mechanism and/or the rotation/vibration speed of the | Is the equipment used in performing the dental procedure | Was any additional equipments used as a standard measure e.g. rubber dam, suction) | If yes, Please specify in here | Person e.g. dental operator, dental nurse/ assistant, patient (choose from dropdown list; Yes, No, N/A) |
|-----------------|----------------------------|-------------------------------------------------------------------|------------------------------------------------------------------------------------------------------------------------|--------------------------------------------------------------------------------------------------------------|----------------------------------------------------------|------------------------------------------------------------------------------------|--------------------------------|---------------------------------------------------------------------------------------------------------|
|-----------------|----------------------------|-------------------------------------------------------------------|------------------------------------------------------------------------------------------------------------------------|--------------------------------------------------------------------------------------------------------------|----------------------------------------------------------|------------------------------------------------------------------------------------|--------------------------------|---------------------------------------------------------------------------------------------------------|

|     |                 |                                                                                               |                                                                                                            | main equipment used                                        | relevant to today's practice (Please choose from the dropdown list Yes, No, N/A) | (Please choose from the dropdown list Yes, No, N/A) |                                                                                                          |                                                              |
|-----|-----------------|-----------------------------------------------------------------------------------------------|------------------------------------------------------------------------------------------------------------|------------------------------------------------------------|----------------------------------------------------------------------------------|-----------------------------------------------------|----------------------------------------------------------------------------------------------------------|--------------------------------------------------------------|
| 99  | Ahmed 2021      | 3 minutes                                                                                     | Two-hole AA87handpiece (PANA MAX, NSK, Tochigi, Japan)<br>- four-hole handpiece (KAVO, Biberach, Germany). | high-speed handpiece                                       | Yes                                                                              | Yes                                                 | High volume suction (DSEplus Type 5193, KAVO, Warthausen, Germany)                                       | Yes                                                          |
| 100 | Allison 2021(a) | High Speed Air Turbine = 10mins<br>3-in-1 Spray = 30 seconds (replicate washing acid etchant) | Air turbine - Synea TA-98, W&H (UK) LTD and 3-in-1 Spray = Model not stated                                | high- speed handpiece. 3-in1 = air and water 140.6mL / min | yes                                                                              | Yes                                                 | Suction for 3-in-1 measure at 6.3L of water per minute. Measured with and without suction for high speed | Yes - simulated body of Mannequin and Operator and Assistant |

|     |                 |                                                                                       |                                                                           |                                                                                                                                                                                                                                     |      |     |                                                                                                                                   |                                                                       |
|-----|-----------------|---------------------------------------------------------------------------------------|---------------------------------------------------------------------------|-------------------------------------------------------------------------------------------------------------------------------------------------------------------------------------------------------------------------------------|------|-----|-----------------------------------------------------------------------------------------------------------------------------------|-----------------------------------------------------------------------|
| 120 | Allison 2021(b) | 10 minutes                                                                            | A speed-increasing handpiece (no water)<br>High-speed                     | Highspeed: Approx:<br>400.000rpm<br><br>Micromotor:<br>60.000rpm;<br>120.000rpm;<br>200.000rpm                                                                                                                                      | yes  | yes | suction (flow rate<br>105l/min)                                                                                                   | Yes - simulated<br>body of Mannequin<br>and Operator and<br>Assistant |
| 127 | Allison 2021(c) | 10 minutes                                                                            | High-speed air-turbine (Synea<br>TA-98, W&H (UK) Ltd.; St<br>Albans, UK). | no                                                                                                                                                                                                                                  | yes  | yes | medium volume<br>suction (dental<br>suction with an<br>8.3 mm internal<br>diameter suction<br>tip at a flow rate<br>of 133 L/min) | Yes                                                                   |
| 93  | Belting 1964    | 1 minute                                                                              | Air rotor                                                                 | The dental air<br>rotor (Borden<br>Airotor, Ritter<br>Co., Inc.,<br>Rochester, N. Y.)<br>with no. 171 bur<br>attached<br>operating at an<br>air flow pressure<br>of 30 psi using<br>30 drops of oil<br>and 18ml water<br>per minute | YES? | Yes | air rotor was used<br>with and without<br>water                                                                                   | No                                                                    |
| 8   | Bentley 1994    | Experiment 1) 2<br>minutes (spatter)<br>Experiment 2a) 30<br>minutes<br>(aerosol with | 1) high speed handpiece 2<br>high speed handpiece                         | Not stated                                                                                                                                                                                                                          | Yes  | Yes | 1) High volume<br>aspirator with<br>high speed<br>handpiece tooth<br>preparation 2a)                                              | Yes                                                                   |

|     |                     |                                                                |                                                                                                                                                 |                         |     |      |                                                                                                                                                                                                                                       |     |
|-----|---------------------|----------------------------------------------------------------|-------------------------------------------------------------------------------------------------------------------------------------------------|-------------------------|-----|------|---------------------------------------------------------------------------------------------------------------------------------------------------------------------------------------------------------------------------------------|-----|
|     |                     | high speed Experiment 2b))30 minutes (aerosol with ultrasonic) |                                                                                                                                                 |                         |     |      | high volume aspirator with high speed handpiece 2b) saliva ejector with ultrasonic scaler                                                                                                                                             |     |
| 29  | Grenier 1995        | High-speed drilling= 8 minutes                                 | High speed handpiece                                                                                                                            | not stated              | Yes | Yes  | rubber dam                                                                                                                                                                                                                            | No  |
| 122 | Grzech-Lesniak 2021 | NA                                                             | highspeed handpiece W&H Synea TA-98LC (W&H, Bürmoos, Austria)<br>low-speed handpiece W&H Synea TA-98LC (W&H, Bürmoos, Austria)                  | 200,000rpm<br>15,000rpm | Yes | Yes  | 1) saliva ejector (SE) EM15 (Monoart® Euronda, Vicenza, Italy) and (2) high-volume evacuator (HVE) EM19 EVO (Monoart® Euronda, Vicenza, Italy).<br>Evacuators were placed at the level of the tooth around 2 cm from its buccal side. | Yes |
| 107 | Han 2021            | Low speed: 5 min<br>Highspeed: 5s<br>triple syringe: 15s       | Air turbine handpiece ((TiMax, NSK, Kanuma, Japan)<br>low-speed air turbine handpiece (W&H implantMED™, Bürmoos, Austria)<br><br>Triple syringe | 300,000 rpm<br>1200 rpm | Yes | None | N/A                                                                                                                                                                                                                                   | Yes |

|     |               |            |                                                                                                                                                                                                                                                                   |                            |     |                                                                                                                       |                                                                                   |     |
|-----|---------------|------------|-------------------------------------------------------------------------------------------------------------------------------------------------------------------------------------------------------------------------------------------------------------------|----------------------------|-----|-----------------------------------------------------------------------------------------------------------------------|-----------------------------------------------------------------------------------|-----|
| 36  | Hausler 1966  | not clear  | high speed handpiece and air turbine                                                                                                                                                                                                                              | 2.000 rpm                  | No  | No                                                                                                                    | This is an old study, here is relevance bt the handpieces etc may not be the same | No  |
| 108 | Holliday 2021 | 10 minutes | Hightspeed Hand piece.                                                                                                                                                                                                                                            | <u>not stated</u>          | Yes | Dental suction at two flow rates:<br>low volume suction, 40 L/min of air;<br>medium volume suction, 159 L/min of air. |                                                                                   | No  |
| 109 | Ionescu 2020  | 4 minutes  | * Hightspeed: Air turbine handpiece (Bora Led, Bien-Air Dental) equipped with a cylindrical diamond bur (835KR.314.016, Komet Italia Srl).<br><br>**Slow-speed: contra-angle handpiece (CA 1:1, Bien-Air) with a round tungsten carbide bur (H1SM.204.020, Komet) | 320,000 rpm.<br>50.000 rpm | Yes | N/A                                                                                                                   | N/A                                                                               | Yes |

|     |                       |             |                                                                                                                                                               |                                                     |      |     |                           |     |
|-----|-----------------------|-------------|---------------------------------------------------------------------------------------------------------------------------------------------------------------|-----------------------------------------------------|------|-----|---------------------------|-----|
|     |                       |             | inside the already prepared cavity.                                                                                                                           |                                                     |      |     |                           |     |
| 91  | Larato 1966           | 1.5-5 mins. | air turbine drill                                                                                                                                             | N/A                                                 | YES? | Yes | Unit aspirating system    | N/A |
| 113 | Llandro 2021          | 10 minutes  | * speed-increasing dental handpiece driven by a dental air motor at full speed (with no water coolant)                                                        |                                                     | Yes  | yes | Large bore dental suction | Yes |
| 50  | Manarte-Monteiro 2013 | 1-4 hours   | Manual (endodontic) + high-speed handpieces (turbine) (for (endodontic & restorative)                                                                         | rotary action, with water-cooling;                  | Yes  | Yes | Rubber dam                | NA  |
| 90  | Miller 1971           | 20 seconds  | Air turbine Handspeed+ 557 bur (multiple procedures). Rubber cup and pumice (periodontics).                                                                   | N/A                                                 | YES? | Yes | High velocity suction     | No  |
| 115 | Nulty 2020            | 1 Minutes   | Electric Micromotor: "Micromotor high-speed handpiece with water"<br>Mircomotor<br>Air turbine: HIGH SPEED WITH WATER<br>Low speed with water<br>Three-in-one |                                                     | Yes  | yes | saliva ejector            | no  |
| 60  | Purohit 2009          | N/A         | Prophylaxis was carried out with a Magnetostrictive scaler working at a speed of 30 kHz, with a water                                                         | Prophylaxis was carried out with a Magnetostrictive | Yes  | No  | N/A                       | Yes |

|    |                      |            |                                                                                                                                                                                                               |                                                                                                                                                                                                                                                                 |     |            |            |     |
|----|----------------------|------------|---------------------------------------------------------------------------------------------------------------------------------------------------------------------------------------------------------------|-----------------------------------------------------------------------------------------------------------------------------------------------------------------------------------------------------------------------------------------------------------------|-----|------------|------------|-----|
|    |                      |            | pressure of 0.3 MPa during each treatment. A high speed air turbine handpiece, working at a speed of 400,000 rpm and with an air drive pressure of 0.25 MPa was used for preparing cavities on carious teeth. | scaler working at a speed of 30 kHz, with a water pressure of 0.3 MPa during each treatment. A high speed air turbine handpiece, working at a speed of 400,000 rpm and with an air drive pressure of 0.25 MPa was used for preparing cavities on carious teeth. |     |            |            |     |
| 63 | Rautemaa<br>2006     | 40 minutes | High speed rotating instrument (for the restorative treatment).<br>No equipment details were provided regarding (endodontic/periodontic) treatment                                                            | Not stated                                                                                                                                                                                                                                                      | N/A | No         | N/A        | Yes |
| 88 | Samaranayake<br>1989 | 5-15 mins. | Not stated                                                                                                                                                                                                    | Not stated                                                                                                                                                                                                                                                      | Yes | Not stated | Not stated | No  |

|     |                 |              |                                                            |            |     |     |                                                          |     |
|-----|-----------------|--------------|------------------------------------------------------------|------------|-----|-----|----------------------------------------------------------|-----|
| 128 | Shahdad 2021    | 20 minutes   | air turbine (W&H Synea Turbine TA-98LED, Bürmoos, Austria) | 360.000rpm | Yes | Yes | high-volume suction (HVS) and a saliva ejector (SE).     | No  |
| 94  | Tag El-Din 1997 | 5-15 minutes | air-turbine-driven handpiece                               | Air driven | Yes | Yes | with and without rubber dam                              | Yes |
| 87  | Yamada 2011     | Not stated   | High speed rotating instrument and ultrasonic scaler       | Not stated | Yes | Yes | High volume evacuator systems (2 at different locations) | No  |

| Unique Study ID | Study author and reference | If the duration of the procedure was stated, please enter it here                                | If applicable, what was the main equipment used in performing the procedure? (e.g. rotary handpiece, ultrasonic scaler) | If stated and considered relevant, what was the working mechanism and/or the rotation/vibration speed of the main equipment used | Is the equipment used in performing the dental procedure relevant to today's practice (Please choose from the dropdown list Yes, No, N/A) |
|-----------------|----------------------------|--------------------------------------------------------------------------------------------------|-------------------------------------------------------------------------------------------------------------------------|----------------------------------------------------------------------------------------------------------------------------------|-------------------------------------------------------------------------------------------------------------------------------------------|
| 99              | Ahmed 2021                 | 3 minutes                                                                                        | Two-hole AA87handpiece (PANA MAX, NSK, Tochigi, Japan)<br>- four-hole handpiece (KAVO, Biberach, Germany).              | high-speed <u>handpiece</u>                                                                                                      | Yes                                                                                                                                       |
| 100             | Allison 2021(a)            | High Speed Air Turbine = 10mins<br>3-in-1 Spray = 30 seconds<br>(replicate washing acid etchant) | Air turbine - Synea TA-98, W&H (UK) LTD and 3-in-1 Spray = Model not stated                                             | high- speed handpiece. 3-in1 = air and water 140.6mL / min                                                                       | yes                                                                                                                                       |

|     |                     |                                                                                                                                                |                                                                                                                                |                                                                                                                                                                                                 |      |
|-----|---------------------|------------------------------------------------------------------------------------------------------------------------------------------------|--------------------------------------------------------------------------------------------------------------------------------|-------------------------------------------------------------------------------------------------------------------------------------------------------------------------------------------------|------|
| 120 | Allison 2021(b)     | 10 minutes                                                                                                                                     | A speed-increasing handpiece (no water)<br>High-speed                                                                          | <b>Highspeed:</b> Approx: 400.000rpm<br><br>Micromotor: 60.000rpm; 120.000rpm; 200.000rpm                                                                                                       | yes  |
| 127 | Allison 2021(c)     | 10 minutes                                                                                                                                     | High-speed air-turbine (Synea TA-98, W&H (UK) Ltd.; St Albans, UK).                                                            | <b>no</b>                                                                                                                                                                                       | yes  |
| 93  | Belting 1964        | 1 minute                                                                                                                                       | Air rotor                                                                                                                      | The dental air rotor (Borden Airotor, Ritter Co., Inc., Rochester, N. Y.) with no. 171 bur attached operating at an air flow pressure of 30 psi using 30 drops of oil and 18ml water per minute | YES? |
| 8   | Bentley 1994        | Experiment 1) 2 minutes (spatter)<br>Experiment 2a) 30 minutes (aerosol with high speed<br>Experiment 2b))30 minutes (aerosol with ultrasonic) | 1) high speed handpiece<br>2 high speed handpiece                                                                              | Not stated                                                                                                                                                                                      | Yes  |
| 29  | Grenier 1995        | High-speed drilling= 8 minutes                                                                                                                 | High speed handpiece                                                                                                           | <b>not stated</b>                                                                                                                                                                               | Yes  |
| 122 | Grzech-Lesniak 2021 | NA                                                                                                                                             | highspeed handpiece W&H Synea TA-98LC (W&H, Bürmoos, Austria)<br>low-speed handpiece W&H Synea TA-98LC (W&H, Bürmoos, Austria) | <b>200,000rpm</b><br><b>15,000rpm</b>                                                                                                                                                           | Yes  |
| 107 | Han 2021            | Low speed: 5 min<br>Highspeed: 5s<br>triple syringe: 15s                                                                                       | Air turbine handpiece ((TiMax, NSK, Kanuma, Japan)<br>low-speed air turbine handpiece (W&H implantMED™, Bürmoos, Austria)      | <b>300,000 rpm</b><br>1200 rpm                                                                                                                                                                  | Yes  |

|     |               |             |                                                                                                                                                                                                                                                                                                              |                                                     |      |
|-----|---------------|-------------|--------------------------------------------------------------------------------------------------------------------------------------------------------------------------------------------------------------------------------------------------------------------------------------------------------------|-----------------------------------------------------|------|
|     |               |             | Triple syringe                                                                                                                                                                                                                                                                                               |                                                     |      |
| 36  | Hausler 1966  | not clear   | high speed handpiece and air turbine                                                                                                                                                                                                                                                                         | 2.000 rpm                                           | No   |
| 108 | Holliday 2021 | 10 minutes  | Hightspeed Hand piece.                                                                                                                                                                                                                                                                                       | not stated                                          | Yes  |
| 109 | Ionescu 2020  | 4 minutes   | <p>* Hightspeed: Air turbine handpiece (Bora Led, Bien-Air Dental) equipped with a cylindrical diamond bur (835KR.314.016, Komet Italia Srl).</p> <p>**Slow-speed: contra-angle handpiece (CA 1:1, Bien-Air) with a round tungsten carbide bur (H1SM.204.020, Komet) inside the already prepared cavity.</p> | <p><u>320,000 rpm.</u></p> <p><u>50.000 rpm</u></p> | Yes  |
| 91  | Larato 1966   | 1.5-5 mins. | air turbine drill                                                                                                                                                                                                                                                                                            | N/A                                                 | YES? |

|     |                       |            |                                                                                                                                                                                                   |                                                                                                                                                                                                                                                                                                                                   |      |
|-----|-----------------------|------------|---------------------------------------------------------------------------------------------------------------------------------------------------------------------------------------------------|-----------------------------------------------------------------------------------------------------------------------------------------------------------------------------------------------------------------------------------------------------------------------------------------------------------------------------------|------|
| 113 | Llandro 2021          | 10 minutes | * speed-increasing dental handpiece driven by a dental air motor at full speed (with no water coolant)                                                                                            |                                                                                                                                                                                                                                                                                                                                   | Yes  |
| 50  | Manarte-Monteiro 2013 | 1-4 hours  | Manual (endodontic) + high-speed handpieces (turbine) (for (endodontic & restorative)                                                                                                             | rotary action, with water-cooling;                                                                                                                                                                                                                                                                                                | Yes  |
| 90  | Miller 1971           | 20 seconds | Air turbine Handspeed+ 557 bur (multiple procedures). Rubber cup and pumice (periodontics).                                                                                                       | N/A                                                                                                                                                                                                                                                                                                                               | YES? |
| 115 | Nulty 2020            | 1 Minutes  | Electric Micromotor: "Micromotor high-speed handpiece with water"<br>Mircomotor<br>Air turbine: HIGH SPEED WITH WATER<br>Low speed with water<br>Three-in-one                                     |                                                                                                                                                                                                                                                                                                                                   | Yes  |
| 60  | Purohit 2009          | N/A        | Prophylaxis was carried out with a Magnetostrictive scaler working at a speed of 30 kHz, with a water pressure of 0.3 MPa during each treatment. A high speed air turbine handpiece, working at a | <b>Prophylaxis was carried out</b> with a Magnetostrictive scaler working at a speed of 30 kHz, with a water pressure of 0.3 MPa during each treatment. A high speed air turbine handpiece, working <b>at a speed of 400,000 rpm</b> and with an air drive pressure of 0.25 MPa was used for preparing cavities on carious teeth. | Yes  |

|     |                      |              |                                                                                                                                                 |                   |     |
|-----|----------------------|--------------|-------------------------------------------------------------------------------------------------------------------------------------------------|-------------------|-----|
|     |                      |              | speed of 400,000 rpm and with an air drive pressure of 0.25 MPa was used for preparing cavities on carious teeth.                               |                   |     |
| 63  | Rautemaa<br>2006     | 40 minutes   | High speed rotating instrument (for the restorative treatment). No equipment details were provided regarding (endodontic/periodontic) treatment | Not stated        | N/A |
| 88  | Samaranayake<br>1989 | 5-15 mins.   | Not stated                                                                                                                                      | Not stated        | Yes |
| 128 | Shahdad 2021         | 20 minutes   | air turbine (W&H Synea Turbine TA-98LED, Bürmoos, Austria)                                                                                      | 360.000rpm        | Yes |
| 94  | Tag El-Din<br>1997   | 5-15 minutes | air-turbine-driven handpiece                                                                                                                    | <u>Air driven</u> | Yes |
| 87  | Yamada 2011          | Not stated   | High speed rotating instrument and ultrasonic scaler                                                                                            | Not stated        | Yes |
